# Supplementary material for: Spatial signatures of anesthesia-induced burst-suppression differ between primates and rodents
Source: eLife. 2022 May 24;11:e74813. doi: 10.7554/eLife.74813 (PMC9129882; doi:10.7554/eLife.74813)
Supplement: Figure 1—source data 1. [file elife-74813-fig1-data1.xlsx]

## Sheet: Figure1G
subject_ID	run	concentration	PC	median_cortexwide_r	asymmetric_PC	EEG_BurstSup
sub-01	2	high	PC1	0.85677	True	True
sub-01	2	high	PC2	0.04872	False	True
sub-01	2	high	PC3	0.08184	False	True
sub-01	2	high	PC4	0.01544	False	True
sub-01	2	high	PC5	0.07396	False	True
sub-01	3	mid	PC1	0.01624	False	False
sub-01	3	mid	PC2	0.05305	False	False
sub-01	3	mid	PC3	0.00188	False	False
sub-01	3	mid	PC4	0.0523	False	False
sub-01	3	mid	PC5	0.08808	False	False
sub-02	2	high	PC1	0.68672	True	True
sub-02	2	high	PC2	0.00444	False	True
sub-02	2	high	PC3	0.03298	False	True
sub-02	2	high	PC4	0.0307	False	True
sub-02	2	high	PC5	0.0475	False	True
sub-02	3	mid	PC1	0.06146	False	False
sub-02	3	mid	PC2	0.06667	False	False
sub-02	3	mid	PC3	0.02211	False	False
sub-02	3	mid	PC4	0.09816	False	False
sub-02	3	mid	PC5	0.03104	False	False
sub-03	2	high	PC1	0.58452	True	True
sub-03	2	high	PC2	0.06122	False	True
sub-03	2	high	PC3	0.04267	False	True
sub-03	2	high	PC4	0.03645	False	True
sub-03	2	high	PC5	0.00733	False	True
sub-03	3	mid	PC1	8e-05	False	False
sub-03	3	mid	PC2	0.00672	False	False
sub-03	3	mid	PC3	0.03975	False	False
sub-03	3	mid	PC4	0.0249	False	False
sub-03	3	mid	PC5	0.05691	False	False
sub-04	2	high	PC1	0.84221	True	True
sub-04	2	high	PC2	0.05662	False	True
sub-04	2	high	PC3	0.14497	False	True
sub-04	2	high	PC4	0.02302	False	True
sub-04	2	high	PC5	0.00545	False	True
sub-04	3	mid	PC1	0.01148	False	False
sub-04	3	mid	PC2	0.00941	False	False
sub-04	3	mid	PC3	0.08078	False	False
sub-04	3	mid	PC4	0.06073	False	False
sub-04	3	mid	PC5	0.04958	False	False
sub-04	4	low	PC1	0.04176	False	False
sub-04	4	low	PC2	0.00634	False	False
sub-04	4	low	PC3	0.08931	False	False
sub-04	4	low	PC4	0.00602	False	False
sub-04	4	low	PC5	0.01228	False	False
sub-05	2	high	PC1	0.76657	True	True
sub-05	2	high	PC2	0.06513	False	True
sub-05	2	high	PC3	0.03136	False	True
sub-05	2	high	PC4	0.02485	False	True
sub-05	2	high	PC5	0.07476	False	True
sub-05	3	mid	PC1	0.16377	False	False
sub-05	3	mid	PC2	0.02839	False	False
sub-05	3	mid	PC3	0.03999	False	False
sub-05	3	mid	PC4	0.04587	False	False
sub-05	3	mid	PC5	0.00654	False	False
sub-05	4	low	PC1	0.04629	False	False
sub-05	4	low	PC2	0.12429	False	False
sub-05	4	low	PC3	0.1704	False	False
sub-05	4	low	PC4	0.06659	False	False
sub-05	4	low	PC5	0.01677	False	False
sub-06	2	high	PC1	0.52207	True	True
sub-06	2	high	PC2	0.09051	False	True
sub-06	2	high	PC3	0.09311	False	True
sub-06	2	high	PC4	0.07953	False	True
sub-06	2	high	PC5	0.00326	False	True
sub-06	3	mid	PC1	0.13708	False	False
sub-06	3	mid	PC2	0.13515	False	False
sub-06	3	mid	PC3	0.09566	False	False
sub-06	3	mid	PC4	0.03104	False	False
sub-06	3	mid	PC5	0.00164	False	False
sub-06	4	low	PC1	0.24957	False	False
sub-06	4	low	PC2	0.10067	False	False
sub-06	4	low	PC3	0.00451	False	False
sub-06	4	low	PC4	0.06686	False	False
sub-06	4	low	PC5	0.05588	False	False
sub-07	2	high	PC1	0.68085	True	True
sub-07	2	high	PC2	0.03353	False	True
sub-07	2	high	PC3	0.00398	False	True
sub-07	2	high	PC4	0.00012	False	True
sub-07	2	high	PC5	0.00665	False	True
sub-07	3	mid	PC1	0.62465	True	True
sub-07	3	mid	PC2	0.2307	False	True
sub-07	3	mid	PC3	0.07577	False	True
sub-07	3	mid	PC4	0.01442	False	True
sub-07	3	mid	PC5	0.04027	False	True
sub-07	4	low	PC1	0.07523	False	False
sub-07	4	low	PC2	0.05509	False	False
sub-07	4	low	PC3	0.13963	False	False
sub-07	4	low	PC4	0.10266	False	False
sub-07	4	low	PC5	0.04935	False	False
sub-08	2	high	PC1	0.83937	True	True
sub-08	2	high	PC2	0.15093	False	True
sub-08	2	high	PC3	0.00089	False	True
sub-08	2	high	PC4	0.00828	False	True
sub-08	2	high	PC5	0.01456	False	True
sub-08	3	mid	PC1	0.00557	False	False
sub-08	3	mid	PC2	0.10264	False	False
sub-08	3	mid	PC3	0.05724	False	False
sub-08	3	mid	PC4	0.01313	False	False
sub-08	3	mid	PC5	0.04699	False	False
sub-08	4	low	PC1	0.02706	False	False
sub-08	4	low	PC2	0.08926	False	False
sub-08	4	low	PC3	0.12155	False	False
sub-08	4	low	PC4	0.01048	False	False
sub-08	4	low	PC5	0.04779	False	False
sub-09	2	high	PC1	0.70531	True	True
sub-09	2	high	PC2	0.00316	False	True
sub-09	2	high	PC3	0.03691	False	True
sub-09	2	high	PC4	0.0045	False	True
sub-09	2	high	PC5	0.047	False	True
sub-09	3	mid	PC1	0.76972	True	True
sub-09	3	mid	PC2	0.10699	False	True
sub-09	3	mid	PC3	0.10472	False	True
sub-09	3	mid	PC4	0.01511	False	True
sub-09	3	mid	PC5	0.00419	False	True
sub-09	4	low	PC1	0.39551	False	False
sub-09	4	low	PC2	0.08545	False	False
sub-09	4	low	PC3	0.08889	False	False
sub-09	4	low	PC4	0.09951	False	False
sub-09	4	low	PC5	0.09737	False	False
sub-10	2	high	PC1	0.72741	True	True
sub-10	2	high	PC2	0.1285	False	True
sub-10	2	high	PC3	0.11722	False	True
sub-10	2	high	PC4	0.02198	False	True
sub-10	2	high	PC5	0.01556	False	True
sub-10	3	mid	PC1	0.41509	False	False
sub-10	3	mid	PC2	0.02475	False	False
sub-10	3	mid	PC3	0.01189	False	False
sub-10	3	mid	PC4	0.05208	False	False
sub-10	3	mid	PC5	0.00865	False	False
sub-10	4	low	PC1	0.03877	False	False
sub-10	4	low	PC2	0.00984	False	False
sub-10	4	low	PC3	0.00349	False	False
sub-10	4	low	PC4	0.1018	False	False
sub-10	4	low	PC5	0.09546	False	False
sub-11	2	high	PC1	0.55133	True	True
sub-11	2	high	PC2	0.08768	False	True
sub-11	2	high	PC3	0.01993	False	True
sub-11	2	high	PC4	0.03274	False	True
sub-11	2	high	PC5	0.00078	False	True
sub-11	3	mid	PC1	0.00062	False	False
sub-11	3	mid	PC2	0.0431	False	False
sub-11	3	mid	PC3	0.16597	False	False
sub-11	3	mid	PC4	0.05132	False	False
sub-11	3	mid	PC5	0.002	False	False
sub-11	4	low	PC1	0.06167	False	False
sub-11	4	low	PC2	0.04398	False	False
sub-11	4	low	PC3	0.03257	False	False
sub-11	4	low	PC4	0.03951	False	False
sub-11	4	low	PC5	0.02533	False	False
sub-12	2	high	PC1	0.47982	True	True
sub-12	2	high	PC2	0.02233	False	True
sub-12	2	high	PC3	0.00437	False	True
sub-12	2	high	PC4	0.00255	False	True
sub-12	2	high	PC5	0.00533	False	True
sub-12	3	mid	PC1	0.1892	False	False
sub-12	3	mid	PC2	0.11985	False	False
sub-12	3	mid	PC3	0.03994	False	False
sub-12	3	mid	PC4	0.05921	False	False
sub-12	3	mid	PC5	0.01328	False	False
sub-12	4	low	PC1	0.00647	False	False
sub-12	4	low	PC2	0.02734	False	False
sub-12	4	low	PC3	0.02846	False	False
sub-12	4	low	PC4	0.12707	False	False
sub-12	4	low	PC5	0.06009	False	False
sub-13	2	high	PC1	0.03951	False	False
sub-13	2	high	PC2	0.0118	False	False
sub-13	2	high	PC3	0.00785	False	False
sub-13	2	high	PC4	0.01229	False	False
sub-13	2	high	PC5	0.09484	False	False
sub-13	3	mid	PC1	0.38644	False	False
sub-13	3	mid	PC2	0.12099	False	False
sub-13	3	mid	PC3	0.0742	False	False
sub-13	3	mid	PC4	0.00856	False	False
sub-13	3	mid	PC5	0.05413	False	False
sub-13	4	low	PC1	0.05945	False	False
sub-13	4	low	PC2	0.15512	False	False
sub-13	4	low	PC3	0.14672	False	False
sub-13	4	low	PC4	0.09454	False	False
sub-13	4	low	PC5	0.07229	False	False
sub-14	2	high	PC1	0.53142	True	True
sub-14	2	high	PC2	0.05817	False	True
sub-14	2	high	PC3	0.00662	False	True
sub-14	2	high	PC4	0.00406	False	True
sub-14	2	high	PC5	0.03892	False	True
sub-14	3	mid	PC1	0.19799	False	False
sub-14	3	mid	PC2	0.03116	False	False
sub-14	3	mid	PC3	0.01042	False	False
sub-14	3	mid	PC4	0.00211	False	False
sub-14	3	mid	PC5	0.01719	False	False
sub-14	4	low	PC1	0.09042	False	False
sub-14	4	low	PC2	0.03886	False	False
sub-14	4	low	PC3	0.08382	False	False
sub-14	4	low	PC4	0.09617	False	False
sub-14	4	low	PC5	0.10081	False	False
sub-15	2	high	PC1	0.15848	False	True
sub-15	2	high	PC2	0.09675	False	True
sub-15	2	high	PC3	0.07546	False	True
sub-15	2	high	PC4	0.04822	False	True
sub-15	2	high	PC5	0.01843	False	True
sub-15	3	mid	PC1	0.56471	True	True
sub-15	3	mid	PC2	0.0909	False	True
sub-15	3	mid	PC3	0.07094	False	True
sub-15	3	mid	PC4	0.0165	False	True
sub-15	3	mid	PC5	0.01592	False	True
sub-15	4	low	PC1	0.08821	False	False
sub-15	4	low	PC2	0.06838	False	False
sub-15	4	low	PC3	0.15919	False	False
sub-15	4	low	PC4	0.01351	False	False
sub-15	4	low	PC5	0.0028	False	False
sub-16	2	high	PC1	0.62928	True	True
sub-16	2	high	PC2	0.04492	False	True
sub-16	2	high	PC3	0.0446	False	True
sub-16	2	high	PC4	0.03409	False	True
sub-16	2	high	PC5	0.02574	False	True
sub-16	3	mid	PC1	0.03728	False	False
sub-16	3	mid	PC2	0.02344	False	False
sub-16	3	mid	PC3	0.12992	False	False
sub-16	3	mid	PC4	0.02372	False	False
sub-16	3	mid	PC5	0.04095	False	False
sub-17	2	high	PC1	0.74559	True	True
sub-17	2	high	PC2	0.03851	False	True
sub-17	2	high	PC3	0.09088	False	True
sub-17	2	high	PC4	0.0094	False	True
sub-17	2	high	PC5	0.03782	False	True
sub-17	3	mid	PC1	0.026	False	False
sub-17	3	mid	PC2	0.00065	False	False
sub-17	3	mid	PC3	0.13694	False	False
sub-17	3	mid	PC4	0.06561	False	False
sub-17	3	mid	PC5	0.07887	False	False
sub-17	4	low	PC1	0.30936	False	False
sub-17	4	low	PC2	0.01867	False	False
sub-17	4	low	PC3	0.04789	False	False
sub-17	4	low	PC4	0.01033	False	False
sub-17	4	low	PC5	0.03667	False	False
sub-18	2	high	PC1	0.79138	True	True
sub-18	2	high	PC2	0.101	False	True
sub-18	2	high	PC3	0.10712	False	True
sub-18	2	high	PC4	0.00679	False	True
sub-18	2	high	PC5	0.03625	False	True
sub-18	3	mid	PC1	0.12478	False	False
sub-18	3	mid	PC2	0.112	False	False
sub-18	3	mid	PC3	0.00796	False	False
sub-18	3	mid	PC4	0.03447	False	False
sub-18	3	mid	PC5	0.00127	False	False
sub-18	4	low	PC1	0.02074	False	False
sub-18	4	low	PC2	0.08032	False	False
sub-18	4	low	PC3	0.05549	False	False
sub-18	4	low	PC4	0.21205	False	False
sub-18	4	low	PC5	0.04132	False	False
sub-19	2	high	PC1	0.75467	True	True
sub-19	2	high	PC2	0.02494	False	True
sub-19	2	high	PC3	0.02708	False	True
sub-19	2	high	PC4	0.05291	False	True
sub-19	2	high	PC5	0.00771	False	True
sub-19	3	mid	PC1	0.4324	False	True
sub-19	3	mid	PC2	0.78835	True	True
sub-19	3	mid	PC3	0.1464	False	True
sub-19	3	mid	PC4	0.06653	False	True
sub-19	3	mid	PC5	0.03074	False	True
sub-19	4	low	PC1	0.05932	False	False
sub-19	4	low	PC2	0.00553	False	False
sub-19	4	low	PC3	0.12022	False	False
sub-19	4	low	PC4	0.05667	False	False
sub-19	4	low	PC5	0.02021	False	False
sub-20	2	high	PC1	0.70461	True	True
sub-20	2	high	PC2	0.07529	False	True
sub-20	2	high	PC3	0.02062	False	True
sub-20	2	high	PC4	0.01363	False	True
sub-20	2	high	PC5	0.06974	False	True
sub-20	3	mid	PC1	0.37993	False	False
sub-20	3	mid	PC2	0.09964	False	False
sub-20	3	mid	PC3	0.03641	False	False
sub-20	3	mid	PC4	0.01839	False	False
sub-20	3	mid	PC5	0.01154	False	False

## Sheet: Figure1H
subject_ID	run	concentration	r_zero_lag	r_max	lag_at_r_max
sub-01	2	high	0.77126	0.890641	4
sub-02	2	high	0.590051	0.796704	6
sub-03	2	high	0.700746	0.827694	2
sub-04	2	high	0.863799	0.867829	-2
sub-05	2	high	0.726945	0.845769	6
sub-06	2	high	0.714621	0.821889	6
sub-08	2	high	0.767612	0.889851	4
sub-09	2	high	0.774089	0.809096	2
sub-10	2	high	0.555963	0.713881	4
sub-11	2	high	0.829445	0.870088	2
sub-12	2	high	0.462436	0.757303	6
sub-14	2	high	0.771012	0.815166	4
sub-16	2	high	0.685699	0.841816	6
sub-17	2	high	0.819568	0.874408	4
sub-18	2	high	0.719768	0.839717	4
sub-19	2	high	0.567438	0.773826	6
sub-20	2	high	0.703444	0.834289	6
sub-07	3	mid	0.656241	0.951054	4
sub-09	3	mid	0.851363	0.872252	2
sub-15	3	mid	0.784023	0.9031	2
sub-19	3	mid	0.915406	0.915406	0
