# Supplementary material for: Spatial signatures of anesthesia-induced burst-suppression differ between primates and rodents
Source: eLife. 2022 May 24;11:e74813. doi: 10.7554/eLife.74813 (PMC9129882; doi:10.7554/eLife.74813)
Supplement: Figure 2—source data 1. [file elife-74813-fig2-data1.xlsx]

## Sheet: Figure2A
subject_ID	concentration	spatial_r
sub-01	high	0.977561
sub-02	high	0.940983
sub-03	high	0.959283
sub-04	high	0.996644
sub-05	high	0.977979
sub-06	high	0.973854
sub-08	high	0.982144
sub-09	high	0.956712
sub-10	high	0.91236
sub-11	high	0.96995
sub-12	high	0.881765
sub-14	high	0.979909
sub-16	high	0.971048
sub-17	high	0.992208
sub-18	high	0.965475
sub-19	high	0.935649
sub-20	high	0.961361
sub-07	mid	0.948584
sub-09	mid	0.991456
sub-15	mid	0.959007
sub-19	mid	0.991558
