# Supplementary material for: Spatial signatures of anesthesia-induced burst-suppression differ between primates and rodents
Source: eLife. 2022 May 24;11:e74813. doi: 10.7554/eLife.74813 (PMC9129882; doi:10.7554/eLife.74813)
Supplement: Figure 3—figure supplement 4—source data 1. [file elife-74813-fig3-figsupp4-data1.xlsx]

## Sheet: Figure3-supplement4B
subject_ID	run	area	tSNR	zstat
sub-01	1	TE	27.3344	8.05063
sub-01	1	V1	23.7375	0.644398
sub-03	1	TE	37.968	14.6572
sub-03	1	V1	28.1634	0.505949
sub-04	1	TE	37.0028	9.46048
sub-04	1	V1	33.1133	-0.553784
sub-04	2	TE	39.9457	3.72696
sub-04	2	V1	33.83	0.14668
sub-05	1	TE	39.828	4.63297
sub-05	1	V1	36.4986	0.384815
sub-07	1	TE	27.4613	8.75941
sub-07	1	V1	26.9655	-0.540231
sub-08	1	TE	40.1915	6.29736
sub-08	1	V1	31.6655	0.308477
sub-10	1	TE	27.9114	11.3196
sub-10	1	V1	25.7071	-0.691247
sub-10	2	TE	28.0745	5.64299
sub-10	2	V1	23.7809	-1.06028
