# Supplementary material for: Spatial signatures of anesthesia-induced burst-suppression differ between primates and rodents
Source: eLife. 2022 May 24;11:e74813. doi: 10.7554/eLife.74813 (PMC9129882; doi:10.7554/eLife.74813)
Supplement: Figure 3—source data 1. [file elife-74813-fig3-data1.xlsx]

## Sheet: Figure3B
subject_ID	run	concentration	PC	median_cortexwide_r	asymmetric_PC
sub-01	1	1.35	PC1	0.24096	True
sub-01	1	1.35	PC2	0.01206	False
sub-01	1	1.35	PC3	0.01645	False
sub-01	1	1.35	PC4	0.00384	False
sub-01	1	1.35	PC5	3e-05	False
sub-02	1	1.45	PC1	0.00832	False
sub-02	1	1.45	PC2	0.01097	False
sub-02	1	1.45	PC3	0.0173	False
sub-02	1	1.45	PC4	0.01199	False
sub-02	1	1.45	PC5	0.03913	False
sub-03	1	1.3	PC1	0.41019	True
sub-03	1	1.3	PC2	0.03388	False
sub-03	1	1.3	PC3	0.01122	False
sub-03	1	1.3	PC4	0.02201	False
sub-03	1	1.3	PC5	0.01125	False
sub-03	2	0.95	PC1	0.06961	False
sub-03	2	0.95	PC2	0.07347	False
sub-03	2	0.95	PC3	0.10678	False
sub-03	2	0.95	PC4	0.04765	False
sub-03	2	0.95	PC5	0.11471	False
sub-04	1	1.35	PC1	0.25416	True
sub-04	1	1.35	PC2	0.00968	False
sub-04	1	1.35	PC3	0.00412	False
sub-04	1	1.35	PC4	0.0159	False
sub-04	1	1.35	PC5	0.0075	False
sub-04	2	1.4	PC1	0.17719	True
sub-04	2	1.4	PC2	0.00257	False
sub-04	2	1.4	PC3	0.00548	False
sub-04	2	1.4	PC4	0.00244	False
sub-04	2	1.4	PC5	0.02045	False
sub-05	1	1.3	PC1	0.1651	True
sub-05	1	1.3	PC2	0.01387	False
sub-05	1	1.3	PC3	0.00255	False
sub-05	1	1.3	PC4	0.00076	False
sub-05	1	1.3	PC5	0.00396	False
sub-05	2	1.2	PC1	0.04809	False
sub-05	2	1.2	PC2	0.01398	False
sub-05	2	1.2	PC3	0.07726	False
sub-05	2	1.2	PC4	0.00793	False
sub-05	2	1.2	PC5	0.00264	False
sub-06	1	1.45	PC1	0.0651	False
sub-06	1	1.45	PC2	0.01465	False
sub-06	1	1.45	PC3	0.02892	False
sub-06	1	1.45	PC4	0.00822	False
sub-06	1	1.45	PC5	0.02463	False
sub-07	1	1.1	PC1	0.31765	True
sub-07	1	1.1	PC2	0.07093	False
sub-07	1	1.1	PC3	0.03926	False
sub-07	1	1.1	PC4	0.02775	False
sub-07	1	1.1	PC5	0.00556	False
sub-07	2	1.15	PC1	0.1387	False
sub-07	2	1.15	PC2	0.05345	False
sub-07	2	1.15	PC3	0.11096	False
sub-07	2	1.15	PC4	0.00465	False
sub-07	2	1.15	PC5	0.02615	False
sub-08	1	1.3	PC1	0.20805	True
sub-08	1	1.3	PC2	0.01427	False
sub-08	1	1.3	PC3	0.00148	False
sub-08	1	1.3	PC4	0.00703	False
sub-08	1	1.3	PC5	0.00513	False
sub-08	2	1.3	PC1	0.09121	False
sub-08	2	1.3	PC2	0.07538	False
sub-08	2	1.3	PC3	0.07078	False
sub-08	2	1.3	PC4	0.00815	False
sub-08	2	1.3	PC5	0.00623	False
sub-09	1	1.3	PC1	0.0001	False
sub-09	1	1.3	PC2	0.07681	False
sub-09	1	1.3	PC3	0.02836	False
sub-09	1	1.3	PC4	0.02346	False
sub-09	1	1.3	PC5	0.02612	False
sub-09	2	1.5	PC1	0.00756	False
sub-09	2	1.5	PC2	0.04631	False
sub-09	2	1.5	PC3	0.02741	False
sub-09	2	1.5	PC4	0.0643	False
sub-09	2	1.5	PC5	0.00631	False
sub-10	1	0.95	PC1	0.41353	True
sub-10	1	0.95	PC2	0.04184	False
sub-10	1	0.95	PC3	0.04683	False
sub-10	1	0.95	PC4	0.03463	False
sub-10	1	0.95	PC5	0.01076	False
sub-10	2	1.2	PC1	0.21361	True
sub-10	2	1.2	PC2	0.03284	False
sub-10	2	1.2	PC3	0.00355	False
sub-10	2	1.2	PC4	0.03094	False
sub-10	2	1.2	PC5	0.02407	False
sub-11	1	1.05	PC1	0.0144	False
sub-11	1	1.05	PC2	0.08086	False
sub-11	1	1.05	PC3	0.03765	False
sub-11	1	1.05	PC4	0.01149	False
sub-11	1	1.05	PC5	0.02606	False
sub-11	2	1.35	PC1	0.00706	False
sub-11	2	1.35	PC2	0.01528	False
sub-11	2	1.35	PC3	0.00058	False
sub-11	2	1.35	PC4	0.01038	False
sub-11	2	1.35	PC5	0.00191	False
sub-12	1	1.5	PC1	0.00995	False
sub-12	1	1.5	PC2	0.00067	False
sub-12	1	1.5	PC3	0.00737	False
sub-12	1	1.5	PC4	0.01084	False
sub-12	1	1.5	PC5	0.07018	False
sub-12	2	1.5	PC1	0.00631	False
sub-12	2	1.5	PC2	0.01962	False
sub-12	2	1.5	PC3	0.02139	False
sub-12	2	1.5	PC4	0.0026	False
sub-12	2	1.5	PC5	0.00221	False
sub-13	1	1.1	PC1	0.11556	False
sub-13	1	1.1	PC2	0.02421	False
sub-13	1	1.1	PC3	0.03855	False
sub-13	1	1.1	PC4	0.00224	False
sub-13	1	1.1	PC5	0.01012	False
sub-13	2	1.3	PC1	0.10477	False
sub-13	2	1.3	PC2	0.02152	False
sub-13	2	1.3	PC3	0.00105	False
sub-13	2	1.3	PC4	0.01961	False
sub-13	2	1.3	PC5	0.04208	False
