# Supplementary material for: Spatial signatures of anesthesia-induced burst-suppression differ between primates and rodents
Source: eLife. 2022 May 24;11:e74813. doi: 10.7554/eLife.74813 (PMC9129882; doi:10.7554/eLife.74813)
Supplement: Figure 4—figure supplement 5—source data 1. [file elife-74813-fig4-figsupp5-data1.xlsx]

## Sheet: Figure4-supplement5B
subject_ID	run	concentration	PC	median_cortexwide_r	asymmetric_PC
sub-21	1	1.1	PC1	0.22374	True
sub-21	1	1.1	PC2	0.03617	False
sub-21	1	1.1	PC3	0.00481	False
sub-21	1	1.1	PC4	0.00366	False
sub-21	1	1.1	PC5	0.00184	False
sub-21	2	1.1	PC1	0.24407	True
sub-21	2	1.1	PC2	0.05354	False
sub-21	2	1.1	PC3	0.01012	False
sub-21	2	1.1	PC4	0.0103	False
sub-21	2	1.1	PC5	0.00939	False
sub-21	3	1.1	PC1	0.23014	True
sub-21	3	1.1	PC2	0.04115	False
sub-21	3	1.1	PC3	0.01028	False
sub-21	3	1.1	PC4	0.01139	False
sub-21	3	1.1	PC5	0.00149	False
sub-21	4	1.1	PC1	0.27504	True
sub-21	4	1.1	PC2	0.05166	False
sub-21	4	1.1	PC3	0.00656	False
sub-21	4	1.1	PC4	0.0137	False
sub-21	4	1.1	PC5	0.00399	False
