# Supplementary material for: Spatial signatures of anesthesia-induced burst-suppression differ between primates and rodents
Source: eLife. 2022 May 24;11:e74813. doi: 10.7554/eLife.74813 (PMC9129882; doi:10.7554/eLife.74813)
Supplement: Figure 4—source data 1. [file elife-74813-fig4-data1.xlsx]

## Sheet: Figure4B
subject_ID	run	concentration	PC	median_cortexwide_r	asymmetric_PC
sub-01	1	1.1	PC1	0.23355	True
sub-01	1	1.1	PC2	0.02438	False
sub-01	1	1.1	PC3	0.00808	False
sub-01	1	1.1	PC4	0.02963	False
sub-01	1	1.1	PC5	0.00224	False
sub-02	1	1	PC1	0.29383	True
sub-02	1	1	PC2	0.00016	False
sub-02	1	1	PC3	0.00839	False
sub-02	1	1	PC4	0.0134	False
sub-02	1	1	PC5	0.02934	False
sub-03	1	0.75	PC1	0.04826	False
sub-03	1	0.75	PC2	0.10642	False
sub-03	1	0.75	PC3	0.08064	False
sub-03	1	0.75	PC4	0.07012	False
sub-03	1	0.75	PC5	0.06547	False
sub-04	1	0.9	PC1	0.07441	False
sub-04	1	0.9	PC2	0.01576	False
sub-04	1	0.9	PC3	0.00305	False
sub-04	1	0.9	PC4	0.00098	False
sub-04	1	0.9	PC5	0.02936	False
sub-05	1	0.8	PC1	0.27446	True
sub-05	1	0.8	PC2	0.02672	False
sub-05	1	0.8	PC3	0.09491	False
sub-05	1	0.8	PC4	0.04051	False
sub-05	1	0.8	PC5	0.14365	False
sub-06	1	0.6	PC1	0.11727	False
sub-06	1	0.6	PC2	0.05072	False
sub-06	1	0.6	PC3	0.0252	False
sub-06	1	0.6	PC4	0.05543	False
sub-06	1	0.6	PC5	0.04763	False
sub-07	1	0.8	PC1	0.07073	False
sub-07	1	0.8	PC2	0.05027	False
sub-07	1	0.8	PC3	0.01443	False
sub-07	1	0.8	PC4	0.01266	False
sub-07	1	0.8	PC5	0.01068	False
sub-08	1	0.95	PC1	0.1439	False
sub-08	1	0.95	PC2	0.20741	False
sub-08	1	0.95	PC3	0.0039	False
sub-08	1	0.95	PC4	0.00465	False
sub-08	1	0.95	PC5	0.00388	False
sub-09	1	0.825	PC1	0.07682	False
sub-09	1	0.825	PC2	0.03445	False
sub-09	1	0.825	PC3	0.00429	False
sub-09	1	0.825	PC4	0.05227	False
sub-09	1	0.825	PC5	0.02876	False
sub-10	1	0.95	PC1	0.32293	True
sub-10	1	0.95	PC2	0.02519	False
sub-10	1	0.95	PC3	0.07765	False
sub-10	1	0.95	PC4	0.01374	False
sub-10	1	0.95	PC5	0.07418	False
sub-11	1	0.75	PC1	0.00599	False
sub-11	1	0.75	PC2	0.02966	False
sub-11	1	0.75	PC3	0.03989	False
sub-11	1	0.75	PC4	0.12985	False
sub-11	1	0.75	PC5	0.00228	False
sub-12	1	0.825	PC1	0.00594	False
sub-12	1	0.825	PC2	0.07724	False
sub-12	1	0.825	PC3	0.04378	False
sub-12	1	0.825	PC4	0.00953	False
sub-12	1	0.825	PC5	0.06288	False
sub-13	1	0.75	PC1	0.18393	False
sub-13	1	0.75	PC2	0.03363	False
sub-13	1	0.75	PC3	0.07002	False
sub-13	1	0.75	PC4	0.01129	False
sub-13	1	0.75	PC5	0.02023	False
sub-14	1	1	PC1	0.38735	True
sub-14	1	1	PC2	0.01906	False
sub-14	1	1	PC3	0.09442	False
sub-14	1	1	PC4	0.01565	False
sub-14	1	1	PC5	0.02047	False
sub-15	1	0.9	PC1	0.03088	False
sub-15	1	0.9	PC2	0.12761	False
sub-15	1	0.9	PC3	0.0078	False
sub-15	1	0.9	PC4	0.00897	False
sub-15	1	0.9	PC5	0.01831	False
sub-16	1	0.95	PC1	0.26604	True
sub-16	1	0.95	PC2	0.00724	False
sub-16	1	0.95	PC3	0.00109	False
sub-16	1	0.95	PC4	0.01919	False
sub-16	1	0.95	PC5	0.04254	False
sub-17	1	0.9	PC1	0.15021	False
sub-17	1	0.9	PC2	0.09463	False
sub-17	1	0.9	PC3	0.04654	False
sub-17	1	0.9	PC4	0.02291	False
sub-17	1	0.9	PC5	0.07656	False
sub-18	1	1	PC1	0.23984	True
sub-18	1	1	PC2	0.01087	False
sub-18	1	1	PC3	0.01373	False
sub-18	1	1	PC4	0.05739	False
sub-18	1	1	PC5	0.01692	False
sub-19	1	0.9	PC1	0.34711	True
sub-19	1	0.9	PC2	0.00157	False
sub-19	1	0.9	PC3	0.06544	False
sub-19	1	0.9	PC4	0.01126	False
sub-19	1	0.9	PC5	0.03358	False
sub-20	1	0.9	PC1	0.076	False
sub-20	1	0.9	PC2	0.05928	False
sub-20	1	0.9	PC3	0.01036	False
sub-20	1	0.9	PC4	0.02768	False
sub-20	1	0.9	PC5	0.00896	False
