# Supplementary material for: Spatial signatures of anesthesia-induced burst-suppression differ between primates and rodents
Source: eLife. 2022 May 24;11:e74813. doi: 10.7554/eLife.74813 (PMC9129882; doi:10.7554/eLife.74813)
Supplement: Figure 5—source data 1. [file elife-74813-fig5-data1.xlsx]

## Sheet: Figure5B
subject_ID	run	concentration	PC	median_cortexwide_r	asymmetric_PC
sub-01	1	2	PC1	0.36855	True
sub-01	1	2	PC2	0.01349	False
sub-01	1	2	PC3	0.018	False
sub-01	1	2	PC4	0.05625	False
sub-01	1	2	PC5	0.05974	False
sub-01	2	2	PC1	0.30737	True
sub-01	2	2	PC2	0.03838	False
sub-01	2	2	PC3	0.02733	False
sub-01	2	2	PC4	0.02519	False
sub-01	2	2	PC5	0.03248	False
sub-01	3	2	PC1	0.09618	False
sub-01	3	2	PC2	0.17931	False
sub-01	3	2	PC3	0.20024	False
sub-01	3	2	PC4	0.11918	False
sub-01	3	2	PC5	0.05516	False
sub-01	4	1.5	PC1	0.0963	False
sub-01	4	1.5	PC2	0.00522	False
sub-01	4	1.5	PC3	0.06796	False
sub-01	4	1.5	PC4	0.17996	False
sub-01	4	1.5	PC5	0.01942	False
sub-01	5	1.5	PC1	0.01253	False
sub-01	5	1.5	PC2	0.05348	False
sub-01	5	1.5	PC3	0.03178	False
sub-01	5	1.5	PC4	0.00667	False
sub-01	5	1.5	PC5	0.00611	False
sub-01	6	1.5	PC1	0.1369	False
sub-01	6	1.5	PC2	0.03298	False
sub-01	6	1.5	PC3	0.02353	False
sub-01	6	1.5	PC4	0.00222	False
sub-01	6	1.5	PC5	0.02125	False
sub-02	1	2	PC1	0.24907	True
sub-02	1	2	PC2	0.04393	False
sub-02	1	2	PC3	0.02775	False
sub-02	1	2	PC4	0.06296	False
sub-02	1	2	PC5	0.023	False
sub-02	2	2	PC1	0.28842	True
sub-02	2	2	PC2	0.08763	False
sub-02	2	2	PC3	0.01845	False
sub-02	2	2	PC4	0.07438	False
sub-02	2	2	PC5	0.05973	False
sub-02	3	2	PC1	0.29063	False
sub-02	3	2	PC2	0.03127	False
sub-02	3	2	PC3	0.17426	False
sub-02	3	2	PC4	0.01035	False
sub-02	3	2	PC5	0.02446	False
sub-02	4	1.5	PC1	0.09184	False
sub-02	4	1.5	PC2	0.07542	False
sub-02	4	1.5	PC3	0.14409	False
sub-02	4	1.5	PC4	0.1846	False
sub-02	4	1.5	PC5	0.07128	False
sub-02	5	1.5	PC1	0.2126	False
sub-02	5	1.5	PC2	0.36391	True
sub-02	5	1.5	PC3	0.10402	False
sub-02	5	1.5	PC4	0.01557	False
sub-02	5	1.5	PC5	0.04578	False
sub-02	6	1.5	PC1	0.05302	False
sub-02	6	1.5	PC2	0.37775	True
sub-02	6	1.5	PC3	0.09446	False
sub-02	6	1.5	PC4	0.08298	False
sub-02	6	1.5	PC5	0.06258	False
sub-03	1	2	PC1	0.37753	True
sub-03	1	2	PC2	0.06771	False
sub-03	1	2	PC3	0.03608	False
sub-03	1	2	PC4	0.06396	False
sub-03	1	2	PC5	0.0006	False
sub-03	2	2	PC1	0.29802	True
sub-03	2	2	PC2	0.0779	False
sub-03	2	2	PC3	0.03007	False
sub-03	2	2	PC4	0.01523	False
sub-03	2	2	PC5	0.05292	False
sub-03	3	2	PC1	0.13622	False
sub-03	3	2	PC2	0.14835	False
sub-03	3	2	PC3	0.10183	False
sub-03	3	2	PC4	0.00932	False
sub-03	3	2	PC5	0.02644	False
sub-03	4	1.5	PC1	0.02442	False
sub-03	4	1.5	PC2	0.00678	False
sub-03	4	1.5	PC3	0.03775	False
sub-03	4	1.5	PC4	0.0386	False
sub-03	4	1.5	PC5	0.11525	False
sub-03	5	1.5	PC1	0.01962	False
sub-03	5	1.5	PC2	0.01668	False
sub-03	5	1.5	PC3	0.02258	False
sub-03	5	1.5	PC4	0.12701	False
sub-03	5	1.5	PC5	0.08001	False
sub-03	6	1.5	PC1	0.09763	False
sub-03	6	1.5	PC2	0.12229	False
sub-03	6	1.5	PC3	0.05202	False
sub-03	6	1.5	PC4	0.04912	False
sub-03	6	1.5	PC5	0.02697	False
sub-04	1	2	PC1	0.38191	True
sub-04	1	2	PC2	0.04351	False
sub-04	1	2	PC3	0.03908	False
sub-04	1	2	PC4	0.02434	False
sub-04	1	2	PC5	0.01844	False
sub-04	2	2	PC1	0.29989	True
sub-04	2	2	PC2	0.03319	False
sub-04	2	2	PC3	0.02354	False
sub-04	2	2	PC4	0.02294	False
sub-04	2	2	PC5	0.04632	False
sub-04	3	2	PC1	0.27064	True
sub-04	3	2	PC2	0.02293	False
sub-04	3	2	PC3	0.03275	False
sub-04	3	2	PC4	0.01927	False
sub-04	3	2	PC5	0.01727	False
sub-04	4	1.5	PC1	0.03554	False
sub-04	4	1.5	PC2	0.23896	False
sub-04	4	1.5	PC3	0.19704	False
sub-04	4	1.5	PC4	0.1493	False
sub-04	4	1.5	PC5	0.02556	False
sub-04	5	1.5	PC1	0.11815	False
sub-04	5	1.5	PC2	0.21009	False
sub-04	5	1.5	PC3	0.07211	False
sub-04	5	1.5	PC4	0.02869	False
sub-04	5	1.5	PC5	0.01622	False
sub-04	6	1.5	PC1	0.09444	False
sub-04	6	1.5	PC2	0.22642	False
sub-04	6	1.5	PC3	0.03616	False
sub-04	6	1.5	PC4	0.03872	False
sub-04	6	1.5	PC5	0.06757	False
sub-05	1	2	PC1	0.36947	True
sub-05	1	2	PC2	0.02368	False
sub-05	1	2	PC3	0.06326	False
sub-05	1	2	PC4	0.02169	False
sub-05	1	2	PC5	0.04035	False
sub-05	2	2	PC1	0.3624	True
sub-05	2	2	PC2	0.04752	False
sub-05	2	2	PC3	0.04623	False
sub-05	2	2	PC4	0.02417	False
sub-05	2	2	PC5	0.04867	False
sub-05	3	2	PC1	0.30086	True
sub-05	3	2	PC2	0.01846	False
sub-05	3	2	PC3	0.00535	False
sub-05	3	2	PC4	0.0887	False
sub-05	3	2	PC5	0.00275	False
sub-05	4	1.5	PC1	0.45045	True
sub-05	4	1.5	PC2	0.13574	False
sub-05	4	1.5	PC3	0.0191	False
sub-05	4	1.5	PC4	0.02537	False
sub-05	4	1.5	PC5	0.06081	False
sub-05	5	1.5	PC1	0.14311	False
sub-05	5	1.5	PC2	0.04651	False
sub-05	5	1.5	PC3	0.17074	False
sub-05	5	1.5	PC4	0.02763	False
sub-05	5	1.5	PC5	0.05505	False
sub-05	6	1.5	PC1	0.03795	False
sub-05	6	1.5	PC2	0.0187	False
sub-05	6	1.5	PC3	0.03589	False
sub-05	6	1.5	PC4	0.0254	False
sub-05	6	1.5	PC5	0.00465	False
sub-06	1	2	PC1	0.18073	False
sub-06	1	2	PC2	0.03396	False
sub-06	1	2	PC3	0.04408	False
sub-06	1	2	PC4	0.03366	False
sub-06	1	2	PC5	0.03381	False
sub-06	2	2	PC1	0.07728	False
sub-06	2	2	PC2	0.22774	True
sub-06	2	2	PC3	0.00222	False
sub-06	2	2	PC4	0.04471	False
sub-06	2	2	PC5	0.05055	False
sub-06	3	2	PC1	0.29395	False
sub-06	3	2	PC2	0.14219	False
sub-06	3	2	PC3	0.16047	False
sub-06	3	2	PC4	0.00696	False
sub-06	3	2	PC5	0.0206	False
sub-06	4	1.5	PC1	0.06205	False
sub-06	4	1.5	PC2	0.0677	False
sub-06	4	1.5	PC3	0.11369	False
sub-06	4	1.5	PC4	0.18075	False
sub-06	4	1.5	PC5	0.05202	False
sub-06	5	1.5	PC1	0.03045	False
sub-06	5	1.5	PC2	0.0652	False
sub-06	5	1.5	PC3	0.24513	True
sub-06	5	1.5	PC4	0.0108	False
sub-06	5	1.5	PC5	0.05344	False
sub-06	6	1.5	PC1	0.14055	False
sub-06	6	1.5	PC2	0.05484	False
sub-06	6	1.5	PC3	0.18956	False
sub-06	6	1.5	PC4	0.07496	False
sub-06	6	1.5	PC5	0.01819	False
sub-07	1	2	PC1	0.19812	False
sub-07	1	2	PC2	0.00169	False
sub-07	1	2	PC3	0.03797	False
sub-07	1	2	PC4	0.01467	False
sub-07	1	2	PC5	0.00845	False
sub-07	2	2	PC1	0.21271	True
sub-07	2	2	PC2	0.00278	False
sub-07	2	2	PC3	0.02577	False
sub-07	2	2	PC4	0.01629	False
sub-07	2	2	PC5	0.01017	False
sub-07	3	2	PC1	0.24748	True
sub-07	3	2	PC2	0.04342	False
sub-07	3	2	PC3	0.00706	False
sub-07	3	2	PC4	0.01542	False
sub-07	3	2	PC5	0.00748	False
sub-07	4	2.5	PC1	0.02107	False
sub-07	4	2.5	PC2	0.0658	False
sub-07	4	2.5	PC3	0.09092	False
sub-07	4	2.5	PC4	0.09835	False
sub-07	4	2.5	PC5	0.01045	False
sub-07	5	2.5	PC1	0.0862	False
sub-07	5	2.5	PC2	0.15945	False
sub-07	5	2.5	PC3	0.1265	False
sub-07	5	2.5	PC4	0.01177	False
sub-07	5	2.5	PC5	0.03386	False
sub-07	6	2.5	PC1	0.12943	False
sub-07	6	2.5	PC2	0.0291	False
sub-07	6	2.5	PC3	0.14492	False
sub-07	6	2.5	PC4	0.02484	False
sub-07	6	2.5	PC5	0.01973	False
sub-08	1	2	PC1	0.043	False
sub-08	1	2	PC2	0.03895	False
sub-08	1	2	PC3	0.14596	False
sub-08	1	2	PC4	0.05241	False
sub-08	1	2	PC5	0.03525	False
sub-08	2	2	PC1	0.01031	False
sub-08	2	2	PC2	0.0119	False
sub-08	2	2	PC3	0.1375	False
sub-08	2	2	PC4	0.07513	False
sub-08	2	2	PC5	0.02832	False
sub-08	3	2	PC1	0.05283	False
sub-08	3	2	PC2	0.23341	True
sub-08	3	2	PC3	0.02545	False
sub-08	3	2	PC4	0.03606	False
sub-08	3	2	PC5	0.0015	False
sub-08	4	2.5	PC1	0.06055	False
sub-08	4	2.5	PC2	0.07427	False
sub-08	4	2.5	PC3	0.03863	False
sub-08	4	2.5	PC4	0.1243	False
sub-08	4	2.5	PC5	0.007	False
sub-08	5	2.5	PC1	0.01836	False
sub-08	5	2.5	PC2	0.13128	False
sub-08	5	2.5	PC3	0.02075	False
sub-08	5	2.5	PC4	0.08439	False
sub-08	5	2.5	PC5	0.01176	False
sub-08	6	2.5	PC1	0.07495	False
sub-08	6	2.5	PC2	0.10924	False
sub-08	6	2.5	PC3	0.07008	False
sub-08	6	2.5	PC4	0.09606	False
sub-08	6	2.5	PC5	0.00829	False
sub-09	1	2	PC1	0.20882	False
sub-09	1	2	PC2	0.06234	False
sub-09	1	2	PC3	0.0097	False
sub-09	1	2	PC4	0.03118	False
sub-09	1	2	PC5	0.00068	False
sub-09	2	2	PC1	0.29689	True
sub-09	2	2	PC2	0.08399	False
sub-09	2	2	PC3	0.05518	False
sub-09	2	2	PC4	0.00413	False
sub-09	2	2	PC5	0.03704	False
sub-09	3	2	PC1	0.27134	True
sub-09	3	2	PC2	0.06449	False
sub-09	3	2	PC3	0.05995	False
sub-09	3	2	PC4	0.00445	False
sub-09	3	2	PC5	0.11999	False
sub-09	4	2.5	PC1	0.04231	False
sub-09	4	2.5	PC2	0.05722	False
sub-09	4	2.5	PC3	0.0334	False
sub-09	4	2.5	PC4	0.14064	False
sub-09	4	2.5	PC5	0.02188	False
sub-09	5	2.5	PC1	0.03441	False
sub-09	5	2.5	PC2	0.02137	False
sub-09	5	2.5	PC3	0.02174	False
sub-09	5	2.5	PC4	0.18364	False
sub-09	5	2.5	PC5	0.03289	False
sub-09	6	2.5	PC1	0.01458	False
sub-09	6	2.5	PC2	0.04798	False
sub-09	6	2.5	PC3	0.16416	False
sub-09	6	2.5	PC4	0.0852	False
sub-09	6	2.5	PC5	0.04961	False
sub-10	1	2	PC1	0.30611	True
sub-10	1	2	PC2	0.00664	False
sub-10	1	2	PC3	0.00268	False
sub-10	1	2	PC4	0.01349	False
sub-10	1	2	PC5	0.00687	False
sub-10	2	2	PC1	0.32126	True
sub-10	2	2	PC2	0.03212	False
sub-10	2	2	PC3	0.01487	False
sub-10	2	2	PC4	0.02665	False
sub-10	2	2	PC5	0.00841	False
sub-10	3	2	PC1	0.09689	False
sub-10	3	2	PC2	0.32848	True
sub-10	3	2	PC3	0.02465	False
sub-10	3	2	PC4	0.01464	False
sub-10	3	2	PC5	0.00616	False
sub-10	4	2.5	PC1	0.21131	False
sub-10	4	2.5	PC2	0.04956	False
sub-10	4	2.5	PC3	0.01387	False
sub-10	4	2.5	PC4	0.04526	False
sub-10	4	2.5	PC5	0.06437	False
sub-11	1	2	PC1	0.23154	True
sub-11	1	2	PC2	0.00795	False
sub-11	1	2	PC3	0.05155	False
sub-11	1	2	PC4	0.00399	False
sub-11	1	2	PC5	0.06373	False
sub-11	2	2	PC1	0.22964	True
sub-11	2	2	PC2	0.02363	False
sub-11	2	2	PC3	0.02003	False
sub-11	2	2	PC4	0.00119	False
sub-11	2	2	PC5	0.06124	False
sub-11	3	2	PC1	0.35128	True
sub-11	3	2	PC2	0.00228	False
sub-11	3	2	PC3	0.01128	False
sub-11	3	2	PC4	0.0523	False
sub-11	3	2	PC5	0.11113	False
sub-11	4	2.5	PC1	0.03498	False
sub-11	4	2.5	PC2	0.03423	False
sub-11	4	2.5	PC3	0.0547	False
sub-11	4	2.5	PC4	0.13644	False
sub-11	4	2.5	PC5	0.04652	False
sub-11	5	2.5	PC1	0.04001	False
sub-11	5	2.5	PC2	0.08553	False
sub-11	5	2.5	PC3	0.12877	False
sub-11	5	2.5	PC4	0.02823	False
sub-11	5	2.5	PC5	0.06219	False
sub-11	6	2.5	PC1	0.17011	False
sub-11	6	2.5	PC2	0.05541	False
sub-11	6	2.5	PC3	0.06916	False
sub-11	6	2.5	PC4	0.04023	False
sub-11	6	2.5	PC5	0.06051	False
