# Supplementary material for: Spatial signatures of anesthesia-induced burst-suppression differ between primates and rodents
Source: eLife. 2022 May 24;11:e74813. doi: 10.7554/eLife.74813 (PMC9129882; doi:10.7554/eLife.74813)
Supplement: Figure 6—figure supplement 1—source data 1. [file elife-74813-fig6-figsupp1-data1.xlsx]

## Sheet: ANOVAs
Variable	Effect	Sphericity correction	Sum of Squares	df	Mean Square	F	p	η2
SD in Cg	Concentration	Greenhouse-Geisser	3.29	1.05	3.131	16.5	0.002	0.47
	Residual	Greenhouse-Geisser	2.2	11.56	0.19
SD in V1	Concentration	Greenhouse-Geisser	0.194	1.13	0.1723	11	0.005	0.285
	Residual	Greenhouse-Geisser	0.194	12.38	0.0157
PSD_low in Cg	Concentration	None	11.51	2	5.756	46.3	<0.001	0.646
	Residual	None	2.74	22	0.124
PSD_low in V1	Concentration	None	2.56	2	1.2785	23.2	<0.001	0.293
	Residual	None	1.21	22	0.0552
PSD_high in Cg	Concentration	None	0.216	2	0.1082	1.82	0.186	0.073
	Residual	None	1.308	22	0.0595
PSD_high in V1	Concentration	Greenhouse-Geisser	5.22	1.28	4.079	36.2	<0.001	0.677
	Residual	Greenhouse-Geisser	1.58	14.07	0.113

## Sheet: Pairwise_T_tests
Variable	Comparison	Mean Difference	SE	df	t	p_tukey
SD in Cg	High - Intermediate	0.689	0.1571	11	4.39	0.003
	High - Low	0.58	0.1565	11	3.7	0.009
	Intermediate - Low	-0.109	0.0287	11	-3.89	0.007
SD in V1	High - Intermediate	-0.0119	0.0132	11	-0.905	0.649
	High - Low	-0.1613	0.0464	11	-3.472	0.013
	Intermediate - Low	-0.1493	0.0455	11	-3.28	0.019
PSD_low in Cg	High - Intermediate	1.369	0.156	11	8.79	<0.001
	High - Low	0.868	0.159	11	5.48	<0.001
	Intermediate - Low	-0.501	0.113	11	-4.42	0.003
PSD_low in V1	High - Intermediate	0.0029	0.0666	11	0.0436	0.999
	High - Low	-0.5639	0.1086	11	-5.1917	<0.001
	Intermediate - Low	-0.5668	0.1066	11	-5.3177	<0.001
PSD_high in V1	High - Intermediate	-0.228	0.0574	11	-3.98	0.006
	High - Low	-0.897	0.1355	11	-6.62	<0.001
	Intermediate - Low	-0.669	0.1198	11	-5.58	<0.001
