# Supplementary material for: Spatial signatures of anesthesia-induced burst-suppression differ between primates and rodents
Source: eLife. 2022 May 24;11:e74813. doi: 10.7554/eLife.74813 (PMC9129882; doi:10.7554/eLife.74813)
Supplement: Figure 6—source data 1. [file elife-74813-fig6-data1.xlsx]

## Sheet: Figure6_SD
species	subject_ID	run	Cg	V1
human	sub-01	2	1.53221	0.193154
human	sub-02	2	0.873084	0.152994
human	sub-03	2	0.877791	0.120917
human	sub-04	2	2.25809	0.100585
human	sub-05	2	1.49558	0.124461
human	sub-06	2	0.602114	0.0988686
human	sub-07	2	0.811339	0.121468
human	sub-07	3	0.817671	0.113862
human	sub-08	2	1.16393	0.123798
human	sub-09	2	0.519213	0.112597
human	sub-09	3	0.82015	0.104911
human	sub-10	2	0.761319	0.490101
human	sub-11	2	0.268942	0.167298
human	sub-12	2	0.553794	0.0907085
human	sub-14	2	0.298521	0.125458
human	sub-15	3	0.646534	0.100458
human	sub-16	2	0.614364	0.153889
human	sub-17	2	0.728414	0.0859655
human	sub-18	2	0.958874	0.171451
human	sub-19	2	0.672917	0.115778
human	sub-19	3	2.35549	0.262073
human	sub-20	2	1.2008	0.178086
macaque	sub-01	1	0.483992	0.118436
macaque	sub-03	1	0.552343	0.0902302
macaque	sub-04	1	0.356902	0.0776709
macaque	sub-04	2	0.290761	0.0737966
macaque	sub-05	1	0.174312	0.0664994
macaque	sub-07	1	0.442659	0.125674
macaque	sub-08	1	0.30446	0.0872354
macaque	sub-10	1	0.549205	0.11179
macaque	sub-10	2	0.388508	0.132263
marmoset	sub-01	1	0.221333	0.148632
marmoset	sub-02	1	0.29738	0.103831
marmoset	sub-05	1	0.453226	0.387415
marmoset	sub-10	1	0.39215	0.120519
marmoset	sub-14	1	0.621965	0.183717
marmoset	sub-16	1	0.467193	0.144933
marmoset	sub-18	1	0.231164	0.136717
marmoset	sub-19	1	0.703086	0.150171
rat	sub-01	1	0.492739	0.576981
rat	sub-01	2	0.434344	0.485948
rat	sub-02	1	0.333911	0.388156
rat	sub-02	2	0.396052	0.49102
rat	sub-02	5	0.609098	0.548933
rat	sub-02	6	0.556944	0.52751
rat	sub-03	1	0.44679	0.631107
rat	sub-03	2	0.419431	0.489746
rat	sub-04	1	0.37845	0.517783
rat	sub-04	2	0.340707	0.437252
rat	sub-04	3	0.333305	0.379954
rat	sub-05	1	0.500376	0.383474
rat	sub-05	2	0.436174	0.357799
rat	sub-05	3	0.463137	0.350499
rat	sub-05	4	0.781841	0.631676
rat	sub-06	2	0.366738	0.333763
rat	sub-06	5	0.406614	0.404556
rat	sub-07	2	0.306834	0.2671
rat	sub-07	3	0.348481	0.318786
rat	sub-08	3	0.297866	0.334822
rat	sub-09	2	0.340138	0.43175
rat	sub-09	3	0.407812	0.432461
rat	sub-10	1	0.331557	0.337185
rat	sub-10	2	0.321969	0.347532
rat	sub-10	3	0.412442	0.377901
rat	sub-11	1	0.314149	0.316427
rat	sub-11	2	0.308772	0.26515
rat	sub-11	3	0.488383	0.435625

## Sheet: Figure6A2
seed	frequency	sub-01_run-2	sub-02_run-2	sub-03_run-2	sub-04_run-2	sub-05_run-2	sub-06_run-2	sub-07_run-2	sub-07_run-3	sub-08_run-2	sub-09_run-2	sub-09_run-3	sub-10_run-2	sub-11_run-2	sub-12_run-2	sub-14_run-2	sub-15_run-3	sub-16_run-2	sub-17_run-2	sub-18_run-2	sub-19_run-2	sub-19_run-3	sub-20_run-2
Cg	0	16.8919	8.89851	1.97612	79.2601	34.2386	3.82887	2.51824	0.1364	5.99384	1.26837	2.08633	2.07644	0.261654	1.26739	1.84821	1.16049	1.60502	4.72882	8.10969	1.85595	8.92828	8.88659
Cg	0.005	114.501	49.9309	17.5212	450.508	193.518	21.1866	33.0872	2.08245	61.1809	14.9002	13.3612	20.6328	2.21184	7.24817	9.60412	8.7767	13.6258	34.2912	50.8288	13.3988	41.009	69.4478
Cg	0.01	166.337	53.4086	30.8804	328.001	205.248	31.3151	58.0489	17.1338	85.8395	25.8207	37.5935	44.9242	4.13213	12.5712	6.26757	15.0648	33.8922	28.2966	64.8596	29.4269	256.847	134.464
Cg	0.015	97.1614	23.9707	20.0264	71.6412	48.0291	15.47	21.6175	31.4265	45.5605	10.3111	37.8987	31.297	2.62754	18.1111	1.1007	11.8062	25.0531	15.6783	51.3131	29.2199	424.236	95.8688
Cg	0.02	36.8793	9.07135	18.7478	79.6121	37.1561	7.34813	11.8087	22.5755	42.6736	3.40794	24.5698	6.98543	1.86313	14.6409	0.984779	6.76643	4.13621	9.92648	15.8794	11.3777	154.143	17.1824
Cg	0.025	9.54948	2.90987	20.0449	30.9332	19.3996	2.291	4.24299	12.081	8.14647	2.07926	14.1948	4.49216	0.741405	4.94741	0.511472	5.29897	2.29985	3.15741	1.89443	3.73024	79.716	5.75119
Cg	0.03	8.29079	1.29303	17.4273	14.6942	9.20758	0.530026	3.72384	16.4662	14.2999	1.06665	6.91314	1.89955	0.347807	1.63781	0.203313	4.34214	2.17598	1.15901	2.72818	2.64602	106.663	2.5845
Cg	0.035	4.05782	1.83506	10.5831	10.0577	4.8887	0.566389	2.43991	13.8099	6.70641	0.391774	2.72155	0.619717	0.201963	1.44134	0.136932	3.70875	0.947762	0.524789	0.855684	0.986908	50.9077	2.33915
Cg	0.04	2.24229	1.05241	7.92251	2.55266	2.14037	0.452177	1.59537	5.56815	2.26592	0.305459	0.820489	1.05182	0.271105	1.05708	0.301604	3.04493	0.32931	0.864941	1.4493	0.458535	31.205	0.616554
Cg	0.045	1.59982	0.99439	4.40128	2.91728	2.27779	0.381142	0.998129	5.48082	2.19086	0.203315	0.581537	0.789924	0.227331	0.446461	0.183651	2.18525	0.366398	0.848287	0.90476	0.497274	13.5194	0.565419
Cg	0.05	1.46247	0.776046	3.00882	1.84603	1.16778	0.352561	0.571663	7.46477	2.41272	0.292501	1.02969	0.387704	0.113302	0.617471	0.110551	1.64414	0.430507	0.731951	0.7022	0.280798	10.2089	1.07277
Cg	0.055	1.05049	0.950325	2.53643	2.00273	1.99585	0.202183	0.299744	3.73201	2.5766	0.151544	0.942874	0.330942	0.12747	0.59238	0.111108	0.999666	0.273802	0.472584	0.294666	0.21803	7.78211	0.426761
Cg	0.06	0.601184	0.52173	3.45749	1.5809	0.870463	0.211942	0.25347	1.63444	1.95427	0.135244	0.894136	0.157576	0.147993	0.362081	0.0698532	0.764591	0.236125	0.250637	0.316722	0.236613	3.8765	0.477478
Cg	0.065	0.419091	0.299153	2.60445	1.30174	0.455984	0.326404	0.279715	2.45374	0.429651	0.190851	0.520993	0.116646	0.0985929	0.407175	0.109416	0.525068	0.178721	0.354411	0.342314	0.151844	2.96875	0.636776
Cg	0.07	0.56413	0.356703	1.02694	0.73316	0.414467	0.282616	0.132164	1.4576	0.349474	0.118515	0.299679	0.161077	0.0862698	0.240849	0.0791742	0.238118	0.27391	0.332367	0.707641	0.123135	0.835887	0.364718
Cg	0.075	0.741599	0.682855	0.971696	0.610105	0.401987	0.233781	0.134408	1.16222	0.83488	0.0306471	0.25007	0.144175	0.128532	0.236741	0.0915424	0.347926	0.258362	0.201778	0.347575	0.192943	1.98368	0.494564
Cg	0.08	0.437041	0.874087	1.18814	0.844394	0.271674	0.188872	0.082514	0.994128	0.742753	0.0656804	0.370979	0.104587	0.217356	0.290952	0.0456837	0.275827	0.189923	0.18864	0.123626	0.0700245	2.4136	0.596479
Cg	0.085	0.139817	0.422215	0.423246	0.867592	0.268612	0.170359	0.0377979	0.503851	0.275364	0.140407	0.320386	0.158302	0.156078	0.258553	0.0648373	0.072096	0.0845641	0.200569	0.124705	0.030807	0.960664	0.0957036
Cg	0.09	0.160059	0.419978	1.12738	0.547544	0.262933	0.20391	0.099001	0.26284	0.292648	0.181591	0.280015	0.256256	0.0828378	0.194197	0.0460907	0.148856	0.0603221	0.103828	0.15888	0.0555138	0.765665	0.137469
Cg	0.095	0.175731	0.435441	1.01159	0.499247	0.23368	0.121094	0.156388	0.486018	0.232976	0.150289	0.206592	0.17365	0.135841	0.204497	0.0803113	0.141384	0.0992735	0.182621	0.270034	0.090589	1.22945	0.117645
Cg	0.1	0.275691	0.537926	0.504669	0.559291	0.307481	0.0653798	0.14045	0.257865	0.524004	0.0679569	0.486262	0.116093	0.235247	0.136607	0.0684366	0.150757	0.178111	0.078406	0.351185	0.107985	0.643876	0.136643
Cg	0.105	0.528125	0.391326	0.29403	0.784843	0.414396	0.11105	0.130529	0.2419	0.681299	0.0466361	0.371662	0.0584102	0.135533	0.100183	0.0446554	0.0634567	0.127147	0.124655	0.220535	0.182601	0.647951	0.102001
Cg	0.11	0.464407	0.163212	0.744612	0.908935	0.561365	0.0804271	0.0888765	0.386418	0.338807	0.0587783	0.350825	0.0817222	0.104662	0.0727613	0.0479476	0.0951104	0.0688123	0.143336	0.172487	0.156512	0.617443	0.0973177
Cg	0.115	0.190178	0.254137	0.846222	0.694706	0.648226	0.075136	0.052745	0.291924	0.179679	0.0949954	0.311676	0.101264	0.0822332	0.0969706	0.0349337	0.237736	0.0978303	0.12757	0.183093	0.11943	0.618429	0.157973
Cg	0.12	0.0455525	0.0509017	0.187721	0.321303	0.117224	0.0486916	0.012635	0.0480676	0.0614342	0.0301114	0.124088	0.0354127	0.037042	0.0759242	0.0153323	0.0614161	0.0325162	0.0686794	0.10817	0.0621828	0.372181	0.0390399
Cg	0.125	0.00213096	0.000965497	0.00552778	0.0132493	0.00226536	0.0042526	0.000985174	0.000341296	0.004104	0.000461864	0.00599015	0.00165207	0.00179641	0.00626433	0.00049847	0.000489086	0.000817106	0.00395525	0.00793775	0.0018894	0.0233228	0.00113812
Cg	0.13	3.94534e-05	1.82601e-05	9.68519e-05	0.00016062	7.6547e-05	5.24439e-05	2.6739e-05	1.48867e-05	3.58026e-05	1.5658e-05	6.01376e-05	4.03109e-05	2.39871e-05	5.93129e-05	9.20355e-06	1.96677e-05	1.49118e-05	5.06094e-05	6.65088e-05	3.03867e-05	0.000221242	2.15869e-05
Cg	0.135	7.17831e-06	2.88453e-06	1.52364e-05	2.0974e-05	1.21254e-05	7.04205e-06	5.71228e-06	2.86427e-06	3.57957e-06	2.59609e-06	7.24797e-06	5.97812e-06	2.67121e-06	6.3691e-06	1.16583e-06	3.09411e-06	2.00074e-06	6.76707e-06	7.41847e-06	3.41469e-06	2.26062e-05	3.82682e-06
Cg	0.14	2.32478e-06	8.29821e-07	4.10947e-06	5.9993e-06	3.34301e-06	1.82509e-06	1.95239e-06	8.74525e-07	7.77191e-07	7.32325e-07	1.82126e-06	1.58014e-06	5.63982e-07	1.3694e-06	2.8637e-07	8.02463e-07	5.02116e-07	1.77617e-06	1.74311e-06	7.44419e-07	4.96894e-06	1.20551e-06
Cg	0.145	1.02247e-06	3.18562e-07	1.4992e-06	2.38697e-06	1.17318e-06	6.64096e-07	8.52927e-07	3.91537e-07	2.48665e-07	2.74601e-07	6.85646e-07	5.68561e-07	1.68922e-07	4.39079e-07	9.5721e-08	2.76578e-07	1.6476e-07	6.44522e-07	5.84615e-07	2.12591e-07	1.5953e-06	5.081e-07
Cg	0.15	5.09165e-07	1.53832e-07	6.42562e-07	1.19371e-06	5.36141e-07	2.87235e-07	4.17556e-07	2.12227e-07	1.14354e-07	1.28505e-07	2.87726e-07	2.53181e-07	6.34006e-08	1.73105e-07	4.19652e-08	1.11476e-07	7.88806e-08	2.97787e-07	2.50855e-07	8.6452e-08	7.00931e-07	2.50945e-07
Cg	0.155	2.95451e-07	7.74919e-08	3.13308e-07	7.34348e-07	2.69544e-07	1.4008e-07	2.19837e-07	1.37053e-07	5.34908e-08	6.86902e-08	1.50561e-07	1.28905e-07	2.54436e-08	8.14743e-08	2.20584e-08	6.15348e-08	3.81426e-08	1.46737e-07	1.27618e-07	3.88696e-08	3.75665e-07	1.3295e-07
Cg	0.16	1.84041e-07	4.83147e-08	1.73476e-07	4.35074e-07	1.48811e-07	7.58812e-08	1.34264e-07	1.02651e-07	3.49108e-08	3.82508e-08	8.48553e-08	7.38668e-08	1.41811e-08	4.52762e-08	1.10601e-08	2.70818e-08	2.18366e-08	8.74593e-08	6.29624e-08	1.83254e-08	2.14886e-07	8.47064e-08
Cg	0.165	1.16489e-07	2.96051e-08	9.57128e-08	2.97764e-07	8.9812e-08	4.71237e-08	8.33826e-08	7.16131e-08	2.11498e-08	2.24844e-08	5.25059e-08	4.72147e-08	8.00377e-09	2.44934e-08	7.44974e-09	1.54544e-08	1.25981e-08	4.80472e-08	4.14233e-08	1.08849e-08	1.37501e-07	5.62595e-08
Cg	0.17	8.06962e-08	1.84236e-08	6.43808e-08	2.09393e-07	5.96893e-08	2.84768e-08	5.32843e-08	5.61127e-08	1.34913e-08	1.75559e-08	3.49139e-08	2.75946e-08	3.60588e-09	1.72423e-08	4.32983e-09	1.08864e-08	1.11545e-08	3.44611e-08	2.59664e-08	7.8821e-09	1.05048e-07	3.54393e-08
Cg	0.175	5.43908e-08	1.34597e-08	4.01116e-08	1.45922e-07	3.77962e-08	1.68769e-08	3.43024e-08	4.31352e-08	1.27344e-08	9.40441e-09	1.88176e-08	2.2128e-08	2.99812e-09	1.12563e-08	3.03119e-09	6.18023e-09	6.59226e-09	1.97969e-08	1.36344e-08	4.38865e-09	7.04779e-08	2.78133e-08
Cg	0.18	4.21627e-08	9.05691e-09	2.78117e-08	1.18429e-07	3.33724e-08	1.29573e-08	2.67118e-08	3.39192e-08	8.27307e-09	8.32218e-09	1.82025e-08	1.4356e-08	1.81398e-09	7.22158e-09	2.32005e-09	5.02193e-09	4.98446e-09	1.70364e-08	1.4792e-08	3.24223e-09	5.08768e-08	1.87149e-08
Cg	0.185	2.88206e-08	8.12165e-09	1.88332e-08	9.71247e-08	1.21578e-08	8.3356e-09	1.7885e-08	2.84985e-08	4.34885e-09	5.46504e-09	7.4299e-09	9.91806e-09	1.13997e-09	5.41234e-09	1.57037e-09	2.42522e-09	4.55055e-09	1.01626e-08	6.34834e-09	2.18441e-09	3.61652e-08	1.56958e-08
Cg	0.19	2.18727e-08	5.21571e-09	1.35595e-08	7.01491e-08	2.31398e-08	6.75475e-09	1.32995e-08	1.92747e-08	8.08552e-09	3.99522e-09	1.00189e-08	9.85151e-09	9.98247e-10	3.75703e-09	1.15594e-09	2.31631e-09	3.40766e-09	7.35723e-09	7.3889e-09	2.17268e-09	3.55801e-08	9.71001e-09
Cg	0.195	1.74899e-08	4.16358e-09	9.83462e-09	4.75488e-08	1.15852e-08	4.23585e-09	9.23535e-09	1.68147e-08	3.94338e-09	3.65415e-09	7.15214e-09	5.28383e-09	6.58837e-10	3.35676e-09	8.70463e-10	2.30486e-09	2.33689e-09	7.49881e-09	3.4695e-09	1.7919e-09	2.30045e-08	7.94338e-09
Cg	0.2	1.35192e-08	4.41274e-09	8.74795e-09	3.62233e-08	7.06945e-09	4.18598e-09	7.6488e-09	1.40939e-08	5.30277e-09	2.65217e-09	3.44242e-09	4.28069e-09	5.22038e-10	1.98414e-09	8.47439e-10	9.52297e-10	2.16397e-09	3.43437e-09	4.17037e-09	1.46606e-09	2.08074e-08	8.26966e-09
Cg	0.205	8.66201e-09	2.88823e-09	4.88804e-09	3.76204e-08	1.00839e-08	2.35109e-09	4.91404e-09	8.51453e-09	2.4819e-09	1.75282e-09	4.21105e-09	3.39509e-09	4.20236e-10	2.58854e-09	3.69785e-10	7.65553e-10	2.1877e-09	4.09031e-09	1.90678e-09	1.35569e-09	1.45229e-08	5.04578e-09
Cg	0.21	1.56348e-08	2.88469e-09	5.49564e-09	2.34817e-08	7.17341e-09	2.47211e-09	3.87405e-09	7.63443e-09	5.96594e-09	1.72224e-09	3.0381e-09	4.14381e-09	4.38904e-10	9.50894e-10	5.10458e-10	9.40883e-10	1.09175e-09	3.15856e-09	2.44171e-09	1.58826e-09	1.84264e-08	4.34822e-09
Cg	0.215	2.81345e-09	1.10495e-09	2.80254e-09	1.28887e-08	4.64072e-09	1.67384e-09	5.39179e-09	6.92897e-09	3.72158e-09	1.34936e-09	2.00742e-09	2.50734e-09	2.14341e-10	1.27378e-09	3.36753e-10	8.08966e-10	1.26892e-09	2.41886e-09	1.82296e-09	1.23445e-09	1.53403e-08	2.69718e-09
Cg	0.22	7.88221e-09	1.67427e-09	3.02286e-09	1.54207e-08	6.66453e-09	1.18682e-09	2.55699e-09	3.50786e-09	3.52908e-09	1.14083e-09	1.7771e-09	1.91352e-09	4.19734e-10	8.10233e-10	1.09525e-10	5.20028e-10	1.27787e-09	1.47386e-09	1.14065e-09	1.47778e-09	7.03197e-09	3.60009e-09
Cg	0.225	3.1244e-09	1.44933e-09	3.34341e-09	1.09668e-08	4.04716e-09	1.81997e-09	4.59068e-09	3.6187e-09	1.8459e-09	1.02651e-09	2.19577e-09	1.20125e-09	1.22175e-10	6.86422e-10	3.34892e-10	5.75818e-10	8.98003e-10	2.95368e-09	1.61625e-09	1.00735e-09	7.18251e-09	2.19678e-09
Cg	0.23	5.81378e-09	1.58003e-09	1.93416e-09	8.4494e-09	3.22748e-09	1.03415e-09	1.22265e-09	1.98604e-09	1.99608e-09	1.39584e-09	1.10597e-09	1.12017e-09	2.60719e-10	7.25161e-10	2.3165e-10	5.37677e-10	1.17246e-09	1.32228e-09	1.06656e-09	1.88485e-10	4.80486e-09	1.94199e-09
Cg	0.235	3.30885e-09	1.99902e-09	1.15496e-09	1.53873e-08	3.20483e-09	1.0886e-09	2.58473e-09	1.7475e-09	1.58788e-09	1.07622e-09	1.68576e-09	1.59261e-09	2.78794e-10	4.64035e-10	2.46105e-10	5.20415e-10	8.03917e-10	1.13764e-09	9.69279e-10	5.12561e-10	5.3047e-09	2.54702e-09
Cg	0.24	4.72213e-09	1.68929e-09	1.69014e-09	6.57383e-09	4.25512e-09	1.25375e-09	9.01073e-10	9.00598e-10	1.34016e-09	7.0598e-10	1.93777e-09	8.03569e-10	1.60626e-10	4.51746e-10	1.03982e-10	2.00893e-10	1.04762e-09	1.48875e-09	5.69778e-10	4.83903e-10	7.30881e-09	2.67384e-09
Cg	0.245	2.48826e-09	9.8899e-10	7.16558e-10	1.55509e-08	3.63326e-09	8.43253e-10	1.63273e-09	1.14268e-09	2.30867e-09	8.26862e-10	4.19521e-09	1.75345e-09	1.56427e-10	6.46189e-10	3.95651e-10	6.9971e-10	1.22106e-09	1.35944e-09	1.69631e-09	1.04082e-09	5.95006e-09	3.05129e-09
Cg	0.25	2.31528e-09	6.84791e-10	7.68491e-10	6.76394e-09	1.44904e-09	6.90547e-10	6.07944e-10	3.94629e-10	3.58007e-10	5.15722e-10	1.65791e-09	5.20619e-10	1.27435e-10	7.40274e-11	9.71948e-11	1.43683e-10	1.67439e-10	1.08098e-09	7.22866e-10	6.0852e-10	3.7136e-09	1.09688e-09
V1	0	0.0743507	0.0458983	0.0764537	0.0350529	0.0557462	0.0126165	0.0145034	0.0442116	0.0245825	0.0432228	0.00420644	3.70934	0.0630543	0.00145871	0.219546	0.00348241	0.104603	0.00960509	0.198136	0.0207412	0.0720649	0.0867571
V1	0.005	0.568428	0.256107	0.356419	0.158935	0.272403	0.0828272	0.153073	0.14333	0.174904	0.312105	0.0797024	22.126	0.694841	0.0211089	1.25878	0.0209383	0.600302	0.0667214	1.01164	0.18485	0.211768	0.562706
V1	0.01	1.31893	0.676905	0.268982	0.108312	0.546206	0.178531	0.282334	0.263285	0.302617	0.697979	0.27088	21.7252	1.05242	0.116146	1.11385	0.110553	1.61262	0.214886	0.983604	0.538322	1.81482	1.97937
V1	0.015	1.17824	0.662739	0.225347	0.0822376	0.402277	0.0779902	0.287895	0.252111	0.231945	0.44756	0.20363	8.23722	0.515964	0.306866	0.416646	0.286859	1.42014	0.122047	1.36245	0.509628	3.70763	2.16361
V1	0.02	1.09102	0.421654	0.176287	0.131722	0.21274	0.0575597	0.239416	0.146021	0.264109	0.203736	0.156915	2.69892	0.461807	0.299159	0.156577	0.248394	0.501525	0.0918155	0.839068	0.289601	2.2534	0.788707
V1	0.025	0.245151	0.399443	0.166496	0.0802366	0.135032	0.11167	0.233238	0.191469	0.150584	0.0892202	0.195118	1.25985	0.493981	0.122875	0.0948697	0.116479	0.237179	0.0877201	0.294445	0.170017	2.0665	0.431421
V1	0.03	0.224852	0.20703	0.161137	0.187435	0.108809	0.0818511	0.222328	0.145098	0.146865	0.0838408	0.0948163	0.30007	0.341691	0.0399036	0.066685	0.0960873	0.203068	0.0599979	0.1715	0.174548	1.62583	0.208375
V1	0.035	0.151984	0.0908318	0.135234	0.105297	0.0591513	0.0726672	0.141801	0.13249	0.0849695	0.0656056	0.108282	0.1453	0.209874	0.0383609	0.0400247	0.0706378	0.139052	0.0615156	0.121318	0.145968	0.575009	0.106527
V1	0.04	0.151923	0.176987	0.140518	0.0488803	0.0712117	0.123178	0.156349	0.164657	0.0457132	0.0567791	0.0893994	0.0995388	0.198512	0.0674711	0.0474677	0.0865264	0.0357829	0.0382159	0.129478	0.136	0.520291	0.0565401
V1	0.045	0.178242	0.174621	0.123934	0.0623068	0.127572	0.107209	0.148427	0.0864913	0.115778	0.0599726	0.0752388	0.136441	0.150761	0.0634964	0.0474703	0.0590841	0.0253564	0.043525	0.0786806	0.0784578	0.300136	0.13128
V1	0.05	0.123302	0.178981	0.0911118	0.0655464	0.0546047	0.0560184	0.0447259	0.096846	0.142344	0.0459355	0.130132	0.0942001	0.227604	0.0752381	0.0292578	0.0798586	0.0414838	0.0443761	0.0549102	0.023921	0.248526	0.137095
V1	0.055	0.0888722	0.0581175	0.0607905	0.0943121	0.0459196	0.0921661	0.0509669	0.191363	0.0728113	0.0542021	0.0577752	0.0655344	0.159592	0.0470458	0.0235527	0.128935	0.039645	0.0274455	0.0236518	0.055939	0.243454	0.0567628
V1	0.06	0.0974605	0.109534	0.0832723	0.0858388	0.0227738	0.1942	0.0830074	0.142348	0.0426088	0.0356107	0.0592172	0.0486405	0.0916339	0.0596241	0.0263328	0.071657	0.0220619	0.0266229	0.0409563	0.0299994	0.307645	0.0304175
V1	0.065	0.0493405	0.142493	0.104993	0.0542612	0.0330476	0.129852	0.0871689	0.0558984	0.0546618	0.0347677	0.0822393	0.0644803	0.0582203	0.0258139	0.0309201	0.073684	0.0316079	0.0517203	0.0393907	0.0575746	0.140255	0.0356177
V1	0.07	0.0499595	0.0896752	0.0685574	0.103592	0.0796954	0.0286191	0.0623879	0.0571729	0.0711304	0.0337665	0.0557801	0.0536362	0.0597151	0.0414558	0.0514718	0.103848	0.0260101	0.057113	0.058174	0.0680899	0.174447	0.0176851
V1	0.075	0.0785245	0.13715	0.102944	0.0753845	0.106355	0.0288299	0.0578425	0.0977023	0.0585588	0.06498	0.0322922	0.0288735	0.112425	0.0642388	0.0519252	0.0501347	0.03099	0.0769831	0.0530593	0.0675339	0.318039	0.0284267
V1	0.08	0.0863905	0.115213	0.0698607	0.0400921	0.176128	0.0495164	0.0577086	0.0636893	0.112169	0.107877	0.0537843	0.0419918	0.100044	0.0532358	0.0213088	0.0651552	0.0320672	0.0678193	0.0639569	0.0578183	0.270105	0.0393512
V1	0.085	0.0790099	0.110461	0.110772	0.0250022	0.0907112	0.0630015	0.0749535	0.0879742	0.169097	0.0614085	0.074648	0.0329605	0.04367	0.0357346	0.0243654	0.0923049	0.0447209	0.0605504	0.0590298	0.0617527	0.138549	0.0854444
V1	0.09	0.1664	0.149871	0.162211	0.0505692	0.0355933	0.0786091	0.0785128	0.0877272	0.104493	0.0485549	0.0536946	0.0426068	0.0676267	0.0324212	0.0233465	0.0377024	0.0716157	0.0644451	0.0583521	0.0673923	0.0640689	0.0283027
V1	0.095	0.105521	0.105779	0.0733396	0.0927486	0.0724655	0.0610861	0.0538028	0.0433716	0.0911012	0.0287487	0.0532114	0.039741	0.0571917	0.0363609	0.0217681	0.0618514	0.0494611	0.0693106	0.064328	0.062988	0.0730662	0.0253093
V1	0.1	0.0872034	0.0910521	0.110478	0.0294641	0.0997678	0.0344557	0.040048	0.0491761	0.406211	0.0142563	0.0765249	0.0742912	0.112843	0.0277579	0.0135523	0.0622044	0.0542181	0.0623817	0.0285537	0.0507159	0.0730089	0.026648
V1	0.105	0.0538099	0.131292	0.176047	0.0677742	0.121208	0.0506044	0.0518782	0.0717109	0.32668	0.0455459	0.0588894	0.0703388	0.155162	0.0290365	0.0155754	0.033296	0.0586076	0.061353	0.02271	0.0612964	0.0573661	0.0191957
V1	0.11	0.0482443	0.101103	0.0893739	0.104296	0.0832583	0.0536826	0.037883	0.0648345	0.0347223	0.0397109	0.0266103	0.046904	0.0841238	0.0430116	0.0256512	0.0359554	0.0243905	0.0535473	0.0396259	0.0719276	0.0725401	0.0363785
V1	0.115	0.135383	0.0883178	0.0338978	0.0494448	0.0751583	0.049293	0.0464331	0.0771109	0.0492652	0.0262719	0.0160543	0.0320976	0.0217018	0.0906987	0.0329282	0.0190197	0.00980186	0.0491718	0.042186	0.0530531	0.0887677	0.0264034
V1	0.12	0.0828638	0.0394131	0.0178428	0.0286754	0.0178022	0.00929278	0.0318117	0.0342161	0.0334469	0.00676326	0.0113996	0.0302738	0.0148399	0.0484524	0.00792253	0.0256748	0.0105757	0.0139684	0.0179688	0.0160677	0.0214987	0.00490953
V1	0.125	0.00406943	0.00151847	0.00102279	0.00217897	0.000507206	0.000209721	0.00169158	0.000982012	0.00174003	0.000199331	0.000967027	0.00205588	0.00123765	0.0021739	9.09318e-05	0.00215997	0.000732484	0.000702251	0.000398336	0.000455291	0.00066614	7.25508e-05
V1	0.13	5.3792e-05	2.37996e-05	1.22716e-05	1.77329e-05	1.01838e-05	4.37933e-06	2.13622e-05	2.34126e-05	1.77499e-05	4.89075e-06	7.62339e-06	2.26463e-05	9.14573e-06	2.91103e-05	2.26516e-06	1.46349e-05	1.02236e-05	8.78774e-06	7.88932e-06	8.57118e-06	1.07985e-05	2.00288e-06
V1	0.135	6.2269e-06	3.13878e-06	1.41521e-06	1.86055e-06	1.54633e-06	7.50687e-07	2.35876e-06	3.08222e-06	1.97621e-06	7.48605e-07	7.46129e-07	2.83535e-06	9.43602e-07	3.30684e-06	3.80091e-07	1.22054e-06	1.32976e-06	1.12005e-06	9.30972e-07	1.18904e-06	1.67556e-06	2.93769e-07
V1	0.14	1.37752e-06	7.87444e-07	3.26168e-07	4.31495e-07	4.16757e-07	2.13695e-07	5.15998e-07	7.27879e-07	4.39471e-07	1.97933e-07	1.55437e-07	7.22719e-07	2.16617e-07	7.24404e-07	1.08844e-07	2.14502e-07	3.33182e-07	2.60145e-07	2.06425e-07	3.01819e-07	4.63513e-07	7.29754e-08
V1	0.145	4.24263e-07	2.69056e-07	1.04683e-07	1.42035e-07	1.57605e-07	7.8165e-08	1.6118e-07	2.3443e-07	1.45593e-07	7.12443e-08	5.02809e-08	2.70547e-07	7.77175e-08	2.15952e-07	4.00918e-08	5.82695e-08	1.11834e-07	8.98691e-08	6.10471e-08	1.11322e-07	1.70449e-07	2.51309e-08
V1	0.15	1.62975e-07	1.16268e-07	4.38862e-08	6.03597e-08	6.82823e-08	3.32688e-08	6.22684e-08	9.23988e-08	5.85412e-08	2.93298e-08	1.82254e-08	1.22541e-07	3.2749e-08	8.1886e-08	1.79214e-08	2.04799e-08	4.79517e-08	3.51346e-08	2.43958e-08	4.59686e-08	7.97925e-08	9.08317e-09
V1	0.155	7.20395e-08	5.40698e-08	2.01294e-08	2.94064e-08	3.43148e-08	1.83859e-08	3.06311e-08	3.94852e-08	2.81767e-08	1.36329e-08	1.00489e-08	6.14335e-08	1.8011e-08	3.69136e-08	8.87411e-09	8.14252e-09	2.36323e-08	1.70468e-08	9.64434e-09	2.36997e-08	3.80973e-08	5.5904e-09
V1	0.16	3.32622e-08	3.06131e-08	1.06716e-08	1.5396e-08	1.94607e-08	8.57394e-09	1.37422e-08	2.1701e-08	1.30393e-08	7.92236e-09	4.12333e-09	3.74571e-08	8.95724e-09	1.65916e-08	4.54478e-09	4.34081e-09	1.21927e-08	8.42548e-09	5.61417e-09	1.30521e-08	2.28778e-08	1.83348e-09
V1	0.165	1.92899e-08	1.6927e-08	5.87015e-09	8.98815e-09	1.15687e-08	5.10887e-09	8.05391e-09	1.10904e-08	8.03865e-09	4.3777e-09	3.22807e-09	2.26832e-08	5.74679e-09	9.26117e-09	3.05103e-09	1.77705e-09	6.63655e-09	4.80352e-09	2.76046e-09	8.0741e-09	1.28837e-08	1.51432e-09
V1	0.17	1.00726e-08	1.01745e-08	4.14451e-09	5.66365e-09	6.74604e-09	3.57961e-09	5.63408e-09	6.75507e-09	4.4114e-09	2.2907e-09	1.28524e-09	1.55134e-08	3.8288e-09	5.22158e-09	1.62831e-09	1.74807e-09	4.69725e-09	3.16866e-09	1.62559e-09	4.77767e-09	8.48006e-09	8.04932e-10
V1	0.175	5.72856e-09	7.29113e-09	2.17157e-09	3.26268e-09	4.84866e-09	1.95295e-09	2.99421e-09	4.1971e-09	2.77063e-09	1.88035e-09	1.1251e-09	1.00227e-08	2.16726e-09	2.92303e-09	1.08379e-09	8.48312e-10	2.68816e-09	1.86286e-09	1.14128e-09	3.00006e-09	5.55981e-09	4.39615e-10
V1	0.18	3.83797e-09	4.32713e-09	1.62814e-09	2.57421e-09	3.08044e-09	1.59051e-09	1.88013e-09	2.35873e-09	1.73581e-09	9.44999e-10	7.07941e-10	8.02393e-09	1.60743e-09	2.3443e-09	7.70823e-10	4.63849e-10	1.64156e-09	1.03303e-09	6.39637e-10	2.33018e-09	3.97155e-09	5.07787e-10
V1	0.185	2.61588e-09	2.89322e-09	1.12315e-09	1.38011e-09	2.25993e-09	8.40631e-10	1.71782e-09	1.91827e-09	1.39797e-09	7.20917e-10	5.13151e-10	3.9605e-09	1.48149e-09	1.00487e-09	5.84283e-10	4.3052e-10	1.26931e-09	1.11526e-09	4.06898e-10	1.52562e-09	2.70376e-09	3.02132e-10
V1	0.19	1.53908e-09	2.23767e-09	6.95559e-10	1.14548e-09	1.57106e-09	7.685e-10	8.94531e-10	1.1766e-09	7.80601e-10	5.47051e-10	3.9015e-10	5.19275e-09	5.70735e-10	1.08805e-09	2.96914e-10	2.83069e-10	7.98339e-10	4.58525e-10	4.96829e-10	1.05252e-09	1.85691e-09	2.3445e-10
V1	0.195	1.50726e-09	1.59671e-09	6.12424e-10	7.27921e-10	1.17802e-09	4.21923e-10	7.26224e-10	9.48223e-10	6.29083e-10	2.90278e-10	3.29885e-10	2.89396e-09	9.84984e-10	6.67893e-10	4.37194e-10	1.65375e-10	7.26835e-10	4.8022e-10	2.88462e-10	8.70703e-10	1.43493e-09	1.95653e-10
V1	0.2	5.97428e-10	1.19905e-09	4.44254e-10	5.14581e-10	1.09977e-09	4.74836e-10	7.15195e-10	7.55213e-10	3.60406e-10	4.28312e-10	2.58842e-10	2.42422e-09	5.12052e-10	3.78962e-10	2.70532e-10	3.2815e-10	5.00694e-10	4.08351e-10	2.74407e-10	6.83911e-10	1.48113e-09	2.7566e-10
V1	0.205	8.00518e-10	7.01377e-10	3.76345e-10	5.79281e-10	3.50792e-10	4.13638e-10	5.50973e-10	5.44272e-10	3.88037e-10	8.70691e-11	9.23022e-11	1.68754e-09	4.5824e-10	5.40465e-10	9.65875e-11	1.41997e-10	4.81292e-10	2.97313e-10	2.11711e-10	2.89066e-10	7.43505e-10	1.89541e-10
V1	0.21	5.01993e-10	7.4534e-10	2.77326e-10	3.34232e-10	7.07035e-10	1.58024e-10	2.20247e-10	5.06147e-10	2.85119e-10	2.6048e-10	2.70671e-10	2.10458e-09	2.38578e-10	2.10167e-10	2.30154e-10	1.54006e-10	1.61368e-10	1.87131e-10	1.4962e-10	4.82568e-10	4.12074e-10	1.33681e-10
V1	0.215	2.47775e-10	5.2514e-10	6.67008e-11	1.97608e-10	5.39599e-10	2.81409e-10	3.42062e-10	2.78379e-10	2.59522e-10	2.30419e-10	1.13429e-10	9.22447e-10	4.3683e-10	1.95477e-10	8.12856e-11	1.22121e-10	3.05088e-10	2.03789e-10	9.8661e-11	2.87863e-10	8.73954e-10	1.85427e-10
V1	0.22	4.14513e-10	3.77379e-10	1.82268e-10	2.38351e-10	2.17297e-10	1.59458e-10	2.1062e-10	2.43392e-10	1.61968e-10	6.20486e-11	1.03087e-10	1.07771e-09	1.77181e-10	2.26048e-10	5.36109e-11	6.75034e-11	1.93176e-10	1.25641e-10	4.99133e-11	1.29905e-10	2.78981e-10	7.79571e-11
V1	0.225	1.83726e-10	3.44757e-10	1.49402e-10	1.41395e-10	1.90106e-10	1.21023e-10	2.75011e-10	2.80212e-10	1.47119e-10	1.37961e-10	7.94613e-11	1.06479e-09	3.14907e-10	2.11099e-10	1.60134e-10	5.91462e-11	2.67875e-10	1.00418e-10	7.27158e-11	2.03337e-10	4.66905e-10	8.36912e-11
V1	0.23	2.19732e-10	3.47531e-10	1.44182e-10	1.31187e-10	3.71071e-10	1.93813e-10	1.50366e-10	2.837e-10	1.56701e-10	1.44625e-10	1.05081e-10	9.83988e-10	1.95571e-10	8.2555e-11	9.69601e-11	1.67793e-10	2.06716e-10	1.174e-10	7.629e-11	1.85815e-10	1.82782e-10	1.35166e-10
V1	0.235	2.07709e-10	1.94226e-10	6.71724e-11	1.24156e-10	1.60385e-10	1.26317e-10	8.58341e-11	1.6859e-10	1.60313e-10	8.53306e-11	4.38269e-11	5.09739e-10	2.04581e-10	1.84295e-10	6.78325e-11	5.7482e-11	1.43425e-10	4.53097e-11	1.02645e-10	6.75888e-11	3.10119e-10	7.41893e-11
V1	0.24	1.79944e-10	3.41708e-10	1.49562e-10	1.20677e-10	2.41809e-10	1.32269e-10	2.07598e-10	2.59446e-10	1.46124e-10	8.45195e-11	7.67548e-11	7.36724e-10	2.51709e-10	7.68425e-11	9.55111e-11	1.2348e-10	1.97239e-10	1.31455e-10	1.35424e-10	1.3467e-10	1.72639e-10	1.46473e-10
V1	0.245	2.28319e-10	2.08172e-10	8.64192e-11	1.16036e-10	2.39386e-10	1.31497e-10	1.86479e-10	1.11866e-10	1.6113e-10	1.17637e-10	1.17753e-10	8.04289e-10	1.89704e-10	1.73394e-10	1.01541e-10	9.52012e-11	1.90734e-10	1.39151e-10	2.25096e-10	7.97442e-11	3.24869e-10	1.05443e-10
V1	0.25	1.48639e-11	1.63017e-10	5.5413e-11	5.84119e-11	9.59669e-11	2.78647e-11	7.59083e-11	1.30729e-10	1.88737e-11	5.11987e-11	3.69492e-11	2.73051e-10	5.93632e-11	2.80384e-11	1.58846e-11	3.38583e-11	2.72311e-11	1.38921e-11	6.87344e-11	5.55505e-11	1.58606e-10	4.26009e-11

## Sheet: Figure6B2
seed	frequency	sub-01_run-1	sub-03_run-1	sub-04_run-1	sub-04_run-2	sub-05_run-1	sub-07_run-1	sub-08_run-1	sub-10_run-1	sub-10_run-2
Cg	0	0.105654	2.00057	0.107768	0.248718	0.0177626	0.521053	0.143746	0.384193	0.188032
Cg	0.005	0.987175	10.0663	1.12802	1.31533	0.151543	2.76596	0.683818	2.23737	0.959157
Cg	0.01	2.36365	14.5021	2.58781	2.05688	0.423145	4.44016	1.6125	5.4335	2.69634
Cg	0.015	2.66145	8.46715	2.57336	1.66888	0.579197	5.29616	1.78041	6.16686	4.14096
Cg	0.02	3.46224	8.40005	1.56941	1.1437	0.579816	3.10547	0.799793	8.05102	3.60211
Cg	0.025	7.93862	5.85223	1.73706	0.884334	0.404972	5.62655	0.921604	9.93986	2.45582
Cg	0.03	6.83741	4.50629	2.21165	0.917501	0.490821	6.09596	1.47042	7.54311	3.94652
Cg	0.035	4.73972	2.10322	2.88037	0.927541	0.396529	2.54236	1.58051	5.75884	4.41205
Cg	0.04	3.9506	1.88904	2.7013	2.18229	0.372106	1.68218	1.81418	2.42263	2.97081
Cg	0.045	1.75902	1.46569	2.32498	1.24446	0.214044	2.59241	1.28599	1.96269	1.50386
Cg	0.05	2.36548	0.699439	1.16704	1.00651	0.247484	1.70842	1.2056	1.8051	1.09685
Cg	0.055	2.64119	0.658454	0.728605	0.463631	0.324973	0.85472	0.889174	1.60183	0.88987
Cg	0.06	1.53293	0.600884	0.471769	0.467286	0.385706	0.816465	1.15861	1.35537	0.541252
Cg	0.065	1.71486	0.450163	0.418835	0.321376	0.340711	0.574439	0.719261	0.796076	0.521447
Cg	0.07	1.03784	0.338335	0.256711	0.178677	0.183929	0.247348	0.577182	0.772891	0.274234
Cg	0.075	0.716598	0.332075	0.408894	0.530295	0.162473	0.329915	0.546912	0.566793	0.127818
Cg	0.08	0.732028	0.2953	0.304476	0.289211	0.161304	0.261727	0.193202	0.472357	0.0967806
Cg	0.085	0.345649	0.169425	0.331927	0.104317	0.134973	0.188842	0.305344	0.628564	0.115925
Cg	0.09	0.208363	0.197367	0.22374	0.121368	0.099187	0.191	0.117341	0.646612	0.088889
Cg	0.095	0.270714	0.198509	0.161148	0.177812	0.100404	0.180924	0.239765	0.351424	0.0863706
Cg	0.1	0.332856	0.0878694	0.093762	0.116105	0.0742542	0.209018	0.283525	0.22409	0.108087
Cg	0.105	0.184625	0.0889656	0.102582	0.0740664	0.061209	0.10136	0.158107	0.213593	0.0707612
Cg	0.11	0.181723	0.116192	0.0970619	0.0290978	0.0496997	0.0903334	0.121617	0.247502	0.0342406
Cg	0.115	0.144915	0.0936952	0.0413398	0.0491933	0.0326584	0.0774591	0.0721463	0.199612	0.0454278
Cg	0.12	0.0713284	0.0782509	0.0102142	0.0265799	0.0170652	0.0254175	0.0236875	0.0551363	0.0276877
Cg	0.125	0.0030341	0.00705851	0.000340601	0.000626346	0.00130138	0.00118967	0.000998532	0.0019707	0.00157569
Cg	0.13	4.8837e-05	4.43715e-05	7.53762e-06	1.11553e-05	1.14853e-05	1.81914e-05	1.59307e-05	5.39804e-05	2.32192e-05
Cg	0.135	5.74071e-06	4.47074e-06	1.21057e-06	1.48415e-06	1.23756e-06	2.54468e-06	2.51298e-06	8.69895e-06	2.5521e-06
Cg	0.14	1.29697e-06	9.39816e-07	3.41664e-07	4.23081e-07	2.81587e-07	6.82573e-07	7.16419e-07	2.40469e-06	5.5147e-07
Cg	0.145	4.05734e-07	2.79655e-07	1.28281e-07	1.64402e-07	9.37039e-08	2.54375e-07	2.75734e-07	8.93013e-07	1.6651e-07
Cg	0.15	1.63223e-07	1.10893e-07	5.89463e-08	8.19507e-08	3.97178e-08	1.20047e-07	1.32171e-07	3.9654e-07	6.65701e-08
Cg	0.155	7.54147e-08	5.37234e-08	3.07653e-08	4.36444e-08	1.96301e-08	6.2609e-08	6.90031e-08	1.95044e-07	3.09462e-08
Cg	0.16	3.84293e-08	2.46579e-08	1.95214e-08	2.80618e-08	1.13359e-08	3.85335e-08	3.85865e-08	1.14092e-07	1.49907e-08
Cg	0.165	2.12582e-08	1.72263e-08	1.10634e-08	1.67025e-08	6.57564e-09	2.27654e-08	2.50407e-08	6.54502e-08	9.29774e-09
Cg	0.17	1.33971e-08	1.05826e-08	7.63382e-09	1.05231e-08	4.24927e-09	1.53381e-08	1.50553e-08	4.13525e-08	5.21706e-09
Cg	0.175	7.1831e-09	5.11027e-09	5.54875e-09	8.16825e-09	2.88447e-09	1.07718e-08	1.05876e-08	2.75844e-08	4.01189e-09
Cg	0.18	6.17233e-09	5.91197e-09	3.93219e-09	4.90288e-09	1.95585e-09	7.41108e-09	7.41909e-09	1.92734e-08	2.24813e-09
Cg	0.185	4.21907e-09	3.5823e-09	3.03128e-09	4.00047e-09	1.57694e-09	4.84785e-09	5.72511e-09	1.25542e-08	2.31179e-09
Cg	0.19	3.04513e-09	2.30626e-09	2.35308e-09	2.644e-09	1.02898e-09	4.75415e-09	3.6312e-09	1.09434e-08	1.3047e-09
Cg	0.195	1.97969e-09	1.84664e-09	1.39155e-09	1.99407e-09	7.33191e-10	3.28592e-09	2.51994e-09	6.84953e-09	1.00138e-09
Cg	0.2	1.76108e-09	1.71765e-09	1.99067e-09	1.39242e-09	6.70216e-10	2.68536e-09	2.71398e-09	6.0933e-09	1.16656e-09
Cg	0.205	1.7045e-09	1.1365e-09	9.65611e-10	1.36305e-09	5.25315e-10	1.64007e-09	1.79672e-09	4.8955e-09	8.54844e-10
Cg	0.21	1.1264e-09	8.93095e-10	1.21641e-09	5.95991e-10	3.09525e-10	1.3961e-09	1.2121e-09	3.44206e-09	6.55242e-10
Cg	0.215	1.40144e-09	1.32903e-09	8.18966e-10	8.99906e-10	4.75724e-10	1.03358e-09	9.02831e-10	3.65622e-09	3.58821e-10
Cg	0.22	1.21583e-09	7.10989e-10	5.18264e-10	4.13083e-10	2.93396e-10	9.41414e-10	9.05237e-10	1.92386e-09	7.33005e-10
Cg	0.225	1.24151e-09	1.14387e-09	6.74942e-10	4.79554e-10	2.21679e-10	7.40713e-10	7.44718e-10	1.91637e-09	8.26945e-10
Cg	0.23	8.84058e-10	8.57459e-10	7.91863e-10	4.98726e-10	2.03742e-10	6.62747e-10	7.24385e-10	2.50251e-09	2.9063e-10
Cg	0.235	1.43415e-09	8.0862e-10	3.64005e-10	1.70769e-10	2.50356e-10	6.36822e-10	5.66951e-10	1.74104e-09	4.44438e-10
Cg	0.24	1.38817e-09	6.58161e-10	7.53406e-10	3.0497e-10	2.28896e-10	6.38713e-10	6.84156e-10	2.01704e-09	5.50899e-10
Cg	0.245	8.06248e-10	6.0068e-10	6.66599e-10	4.75973e-10	2.26736e-10	5.9892e-10	7.38559e-10	1.13665e-09	1.93074e-10
Cg	0.25	5.6996e-10	7.90063e-11	4.22432e-10	3.83209e-11	4.77397e-11	2.45811e-10	1.41997e-10	9.7386e-10	4.90765e-11
V1	0	0.0449399	0.00911714	0.00380822	7.45107e-05	0.0060508	0.015107	0.00997738	0.0225282	0.0186334
V1	0.005	0.254426	0.0329395	0.0373826	0.00299174	0.0322539	0.0627892	0.0650145	0.138296	0.160478
V1	0.01	0.211848	0.0833925	0.0795411	0.0210102	0.0517059	0.100024	0.0891975	0.259946	0.185471
V1	0.015	0.164849	0.12462	0.0979122	0.0381083	0.0453921	0.127925	0.0889577	0.173634	0.176407
V1	0.02	0.169396	0.162089	0.0904457	0.0268216	0.0446979	0.108698	0.133194	0.208408	0.234006
V1	0.025	0.0922919	0.111144	0.070519	0.0590419	0.0358458	0.14981	0.0826213	0.134021	0.212598
V1	0.03	0.0596739	0.114498	0.0564863	0.134906	0.0400108	0.13678	0.0666927	0.0783197	0.136643
V1	0.035	0.103112	0.114748	0.0460956	0.103292	0.048894	0.11887	0.0404421	0.102842	0.200751
V1	0.04	0.0786063	0.0819792	0.056367	0.0922053	0.0435293	0.153603	0.0461415	0.12863	0.143883
V1	0.045	0.105878	0.0478613	0.0496385	0.0698231	0.0271165	0.28722	0.0575265	0.13663	0.127505
V1	0.05	0.147082	0.0549139	0.0343272	0.085902	0.0353724	0.175733	0.0472377	0.0707437	0.117586
V1	0.055	0.187027	0.0807612	0.0362888	0.0873582	0.0438417	0.112062	0.0540141	0.0772109	0.0613346
V1	0.06	0.156821	0.0830271	0.0370785	0.0507087	0.032382	0.184517	0.0474099	0.105025	0.103375
V1	0.065	0.140728	0.0540612	0.0482612	0.0390831	0.0249064	0.172134	0.0544656	0.0426874	0.0953777
V1	0.07	0.108627	0.0598371	0.0458943	0.0336257	0.0373671	0.218632	0.0639682	0.0514159	0.0993171
V1	0.075	0.0696547	0.0719268	0.0317588	0.0462441	0.0300141	0.175105	0.0690556	0.0656425	0.125467
V1	0.08	0.10121	0.051273	0.0342424	0.0251094	0.0228464	0.0961003	0.0691656	0.101741	0.0590905
V1	0.085	0.103326	0.0453698	0.0419868	0.0180815	0.046551	0.0415736	0.0547353	0.087575	0.106612
V1	0.09	0.111946	0.0487411	0.0510508	0.017553	0.0547548	0.0524992	0.0343085	0.0533159	0.115948
V1	0.095	0.148607	0.068326	0.050169	0.0379579	0.0649027	0.078337	0.0549037	0.0610653	0.109404
V1	0.1	0.112513	0.0669958	0.0435693	0.0244404	0.0163225	0.133617	0.0469317	0.123207	0.0969707
V1	0.105	0.0797881	0.0391487	0.0621563	0.03878	0.0365332	0.143494	0.0767127	0.124029	0.156833
V1	0.11	0.0702195	0.0396726	0.0758768	0.0401671	0.0365976	0.140284	0.107031	0.0866165	0.116155
V1	0.115	0.0615544	0.0432794	0.047543	0.037486	0.0235445	0.07146	0.0863255	0.0971845	0.117947
V1	0.12	0.0284101	0.0338429	0.0231116	0.0206961	0.0104439	0.0307202	0.0363976	0.0463673	0.0593376
V1	0.125	0.00182928	0.00336771	0.00134025	0.00131493	0.000650329	0.00163103	0.00203485	0.00273803	0.00438978
V1	0.13	1.25822e-05	2.32626e-05	1.52893e-05	1.16089e-05	6.82096e-06	1.54387e-05	1.78248e-05	2.24827e-05	4.44526e-05
V1	0.135	1.70231e-06	2.59047e-06	1.76243e-06	1.36596e-06	7.17031e-07	1.84907e-06	2.26906e-06	2.56862e-06	5.36243e-06
V1	0.14	4.41572e-07	5.56463e-07	4.04137e-07	3.15452e-07	1.51603e-07	4.29875e-07	5.53056e-07	5.72915e-07	1.26519e-06
V1	0.145	1.65961e-07	1.73319e-07	1.31479e-07	1.01688e-07	4.61593e-08	1.4332e-07	1.85391e-07	1.8282e-07	4.25055e-07
V1	0.15	7.04161e-08	6.32527e-08	5.33776e-08	4.07913e-08	1.71177e-08	5.73531e-08	7.47169e-08	7.08204e-08	1.71071e-07
V1	0.155	3.58764e-08	2.72106e-08	2.44333e-08	1.9983e-08	7.75954e-09	2.63107e-08	3.46401e-08	3.19169e-08	8.09486e-08
V1	0.16	1.96127e-08	1.42344e-08	1.25018e-08	8.4508e-09	3.52507e-09	1.47628e-08	1.82662e-08	1.6264e-08	4.26001e-08
V1	0.165	1.13449e-08	6.85375e-09	6.94876e-09	5.81551e-09	2.12353e-09	7.31995e-09	1.02145e-08	9.02774e-09	2.34835e-08
V1	0.17	6.84553e-09	4.10899e-09	4.18482e-09	2.81565e-09	1.08375e-09	5.11211e-09	5.76123e-09	4.8461e-09	1.36889e-08
V1	0.175	4.57687e-09	2.30108e-09	2.5558e-09	1.80684e-09	7.8472e-10	2.67962e-09	3.37876e-09	3.34285e-09	9.41846e-09
V1	0.18	3.0297e-09	1.60841e-09	1.6841e-09	1.26348e-09	4.24639e-10	2.34977e-09	2.50836e-09	2.06558e-09	5.69199e-09
V1	0.185	1.97033e-09	8.55716e-10	1.09308e-09	9.52381e-10	3.49085e-10	1.09382e-09	1.3951e-09	1.35259e-09	3.66681e-09
V1	0.19	1.3998e-09	6.84093e-10	7.12412e-10	5.77331e-10	2.01066e-10	8.85514e-10	1.03893e-09	8.99665e-10	3.27012e-09
V1	0.195	1.1348e-09	4.89432e-10	5.41783e-10	3.23103e-10	1.69208e-10	8.06503e-10	7.69886e-10	7.62732e-10	1.89142e-09
V1	0.2	8.22022e-10	2.80727e-10	3.56115e-10	3.92755e-10	1.07071e-10	4.93854e-10	4.83519e-10	5.68611e-10	1.52387e-09
V1	0.205	4.82007e-10	3.00573e-10	2.48253e-10	2.35425e-10	8.207e-11	4.18299e-10	4.24784e-10	3.43759e-10	1.1289e-09
V1	0.21	5.62056e-10	1.89736e-10	2.34371e-10	1.591e-10	6.85411e-11	3.32519e-10	1.9466e-10	2.47215e-10	9.85726e-10
V1	0.215	2.80912e-10	1.28313e-10	1.77477e-10	1.89801e-10	1.01694e-10	2.78302e-10	2.4696e-10	3.204e-10	6.22079e-10
V1	0.22	3.32247e-10	1.64535e-10	9.35251e-11	9.76283e-11	5.34645e-11	2.36592e-10	1.61588e-10	1.64285e-10	7.25549e-10
V1	0.225	2.25217e-10	1.28508e-10	1.51151e-10	2.02968e-10	6.12e-11	1.57137e-10	1.35435e-10	1.97588e-10	4.89338e-10
V1	0.23	3.01702e-10	9.72519e-11	7.58205e-11	4.36352e-11	3.02474e-11	1.86008e-10	8.23364e-11	1.27942e-10	5.20336e-10
V1	0.235	1.81786e-10	1.37572e-10	1.05139e-10	1.4006e-10	8.41306e-11	1.35582e-10	1.13205e-10	1.25801e-10	4.9525e-10
V1	0.24	2.87157e-10	7.11289e-11	8.84804e-11	8.41744e-11	8.08665e-11	1.48843e-10	1.29414e-10	2.00517e-10	3.65006e-10
V1	0.245	1.34202e-10	9.88933e-11	6.97656e-11	5.36441e-11	5.57069e-11	2.58191e-10	1.1167e-10	1.06921e-10	3.95964e-10
V1	0.25	1.02645e-10	3.38767e-11	2.2783e-11	6.30011e-11	8.16372e-12	4.93282e-11	1.4298e-11	5.01723e-11	1.78597e-10

## Sheet: Figure6C2
seed	frequency	sub-01	sub-02	sub-05	sub-10	sub-14	sub-16	sub-18	sub-19
Cg	0	0.157957	0.0546783	0.00242013	0.0304491	0.214084	0.0982603	0.072443	0.165654
Cg	0.005	0.854646	0.854967	0.0868908	0.224456	1.71407	0.848561	0.378065	1.2528
Cg	0.01	1.99462	1.18947	0.0702866	0.768116	5.31921	6.09247	0.972416	10.0103
Cg	0.015	1.54692	1.01576	0.164846	2.22104	11.5885	7.49432	0.85692	11.6403
Cg	0.02	1.53686	2.80661	0.402861	3.36975	8.5004	6.9593	0.686923	9.86812
Cg	0.025	0.933172	2.43563	0.613338	3.52341	5.13213	5.74131	0.609538	9.53344
Cg	0.03	0.987154	1.67367	1.29324	3.33651	9.48977	6.94625	0.349585	5.8076
Cg	0.035	0.740731	0.660038	1.17071	2.47056	7.97982	3.20709	0.334724	8.67476
Cg	0.04	0.51812	0.296823	1.46519	4.81223	5.47264	1.80471	0.292952	8.60426
Cg	0.045	0.39489	0.526929	0.869139	2.86625	2.78739	1.33318	0.312087	5.47631
Cg	0.05	0.288305	1.11681	1.2587	1.03868	2.8601	1.87317	0.443144	5.15629
Cg	0.055	0.267601	0.806717	1.92454	1.27487	1.19618	0.764412	0.466512	5.84042
Cg	0.06	0.232108	0.635373	2.68962	1.68517	2.58041	0.636128	0.379166	3.58282
Cg	0.065	0.109901	0.123156	2.87103	1.05748	4.17819	0.487725	0.514952	3.82653
Cg	0.07	0.0402338	0.29487	3.19829	0.274598	4.88199	0.373068	0.531376	2.46406
Cg	0.075	0.0716057	0.318525	2.50657	0.520161	1.5946	0.219081	0.488833	2.98665
Cg	0.08	0.184811	0.233083	1.38613	0.507526	1.10434	0.153824	0.328085	4.28589
Cg	0.085	0.212215	0.113728	2.01481	0.504086	1.45277	0.176498	0.433188	2.53314
Cg	0.09	0.107401	0.120243	1.57354	0.309639	1.09298	0.181346	0.605063	0.843578
Cg	0.095	0.0277745	0.0633346	3.93748	0.151714	0.723395	0.204712	0.427023	0.430808
Cg	0.1	0.0401115	0.0577135	7.28732	0.135903	0.621239	0.108597	0.508034	0.859341
Cg	0.105	0.030362	0.0860376	4.04143	0.257276	0.481743	0.076948	0.234907	0.910698
Cg	0.11	0.0304371	0.0925187	1.67343	0.28387	0.276718	0.132991	0.461061	0.46724
Cg	0.115	0.030041	0.0514817	1.23306	0.297733	0.224664	0.129979	0.57103	0.514897
Cg	0.12	0.00456253	0.0235347	0.477308	0.15369	0.0609131	0.0427579	0.116921	0.349812
Cg	0.125	9.21425e-05	0.00136373	0.0208807	0.00950815	0.00140052	0.00149275	0.00156517	0.0276268
Cg	0.13	2.56634e-06	1.84359e-05	0.000264464	0.000108857	4.25033e-05	3.71787e-05	3.84157e-05	0.000311478
Cg	0.135	4.911e-07	2.15972e-06	3.25399e-05	1.15946e-05	7.82105e-06	5.18414e-06	5.79709e-06	3.38909e-05
Cg	0.14	1.65416e-07	4.96447e-07	8.02445e-06	2.44853e-06	2.45397e-06	1.26741e-06	1.50275e-06	7.41719e-06
Cg	0.145	7.15141e-08	1.56343e-07	2.81017e-06	7.21879e-07	1.00455e-06	4.27351e-07	5.273e-07	2.35761e-06
Cg	0.15	3.83409e-08	6.21453e-08	1.20882e-06	2.67548e-07	4.80826e-07	1.7255e-07	2.22657e-07	9.36557e-07
Cg	0.155	2.11526e-08	2.89663e-08	5.88485e-07	1.15369e-07	2.55205e-07	8.14142e-08	1.0613e-07	4.40875e-07
Cg	0.16	1.31831e-08	1.42927e-08	3.16894e-07	5.5473e-08	1.46351e-07	4.13808e-08	5.53626e-08	2.19846e-07
Cg	0.165	7.9849e-09	7.65478e-09	1.86021e-07	3.03512e-08	8.91605e-08	2.51829e-08	3.15414e-08	1.32419e-07
Cg	0.17	6.65636e-09	5.68919e-09	1.12935e-07	1.45692e-08	5.85155e-08	1.36115e-08	1.94281e-08	7.83363e-08
Cg	0.175	3.37858e-09	2.8741e-09	7.43334e-08	1.11361e-08	3.76233e-08	9.9079e-09	1.24464e-08	4.99523e-08
Cg	0.18	3.00215e-09	2.06932e-09	4.78458e-08	6.19954e-09	2.65383e-08	5.57197e-09	7.35259e-09	3.30967e-08
Cg	0.185	2.19468e-09	1.54672e-09	3.38312e-08	5.01992e-09	1.90052e-08	5.29502e-09	5.36968e-09	2.39151e-08
Cg	0.19	1.6459e-09	1.1964e-09	2.19931e-08	2.68253e-09	1.34533e-08	2.18554e-09	3.62793e-09	1.57342e-08
Cg	0.195	1.19691e-09	7.79928e-10	1.58912e-08	2.86575e-09	9.03828e-09	2.66317e-09	2.38684e-09	1.24954e-08
Cg	0.2	9.66488e-10	5.87302e-10	1.44631e-08	1.20202e-09	8.25887e-09	1.55986e-09	2.30422e-09	8.89032e-09
Cg	0.205	5.77148e-10	6.31556e-10	7.79122e-09	1.89591e-09	4.71669e-09	1.15665e-09	1.25023e-09	7.57965e-09
Cg	0.21	5.75246e-10	3.74168e-10	8.21783e-09	8.5298e-10	4.38206e-09	8.39942e-10	8.28788e-10	4.319e-09
Cg	0.215	5.21455e-10	3.68175e-10	4.94942e-09	1.08962e-09	3.07472e-09	5.2439e-10	8.02574e-10	5.36965e-09
Cg	0.22	2.62301e-10	3.77404e-10	4.40665e-09	9.61412e-10	2.76782e-09	1.12362e-09	6.72014e-10	2.77775e-09
Cg	0.225	3.45323e-10	2.75081e-10	3.78466e-09	6.95006e-10	2.97149e-09	1.94574e-10	3.1057e-10	3.55032e-09
Cg	0.23	3.70634e-10	4.57122e-10	2.88919e-09	6.26783e-10	9.10231e-10	1.7223e-10	5.17626e-10	2.37362e-09
Cg	0.235	1.65234e-10	6.05267e-11	2.33521e-09	6.90384e-10	2.34481e-09	5.42255e-10	3.83198e-10	2.08176e-09
Cg	0.24	1.4108e-10	1.53849e-10	2.89952e-09	4.44363e-10	9.56108e-10	3.27343e-10	2.72561e-10	2.18225e-09
Cg	0.245	1.27772e-10	2.79543e-10	1.68093e-09	8.53309e-10	1.65431e-09	1.99822e-10	1.53305e-10	2.05224e-09
Cg	0.25	1.02416e-10	1.44614e-10	1.57385e-09	1.97628e-10	3.40416e-10	8.35066e-11	1.64782e-10	1.25776e-09
V1	0	0.0482268	0.00643377	0.00599623	0.00349198	0.00403544	0.059318	0.0667777	0.049435
V1	0.005	0.254601	0.0754822	0.086799	0.0099068	0.0666471	0.127996	0.236227	0.12669
V1	0.01	0.782398	0.148789	0.239593	0.0317565	0.348013	0.775109	0.49175	0.316354
V1	0.015	0.516812	0.112403	0.217212	0.0690088	0.452926	0.789126	0.373751	0.354103
V1	0.02	0.352953	0.144836	0.154086	0.195814	0.209051	0.346159	0.218849	0.276094
V1	0.025	0.320416	0.0685855	0.125178	0.748613	0.10022	0.396489	0.148343	0.264345
V1	0.03	0.284149	0.0851073	0.151419	0.309402	0.0737286	0.251764	0.0985882	0.357785
V1	0.035	0.235979	0.111426	0.19381	0.0403159	0.193486	0.109811	0.174041	0.250781
V1	0.04	0.176479	0.154879	0.18223	0.11554	0.258	0.0453883	0.182386	0.186999
V1	0.045	0.10549	0.153904	0.184474	0.12881	0.12175	0.0871669	0.090039	0.158956
V1	0.05	0.179629	0.10643	0.20374	0.163952	0.137044	0.220474	0.120797	0.200771
V1	0.055	0.238407	0.0664795	0.341263	0.201772	0.167454	0.12917	0.0897681	0.183306
V1	0.06	0.294006	0.029802	0.368021	0.0893384	0.0818108	0.0715614	0.144742	0.152352
V1	0.065	0.206351	0.0510254	0.2612	0.17426	0.136549	0.0757367	0.204824	0.187155
V1	0.07	0.136407	0.0331159	0.265287	0.12871	0.18713	0.03966	0.235449	0.240962
V1	0.075	0.0907221	0.0288032	0.466264	0.137581	0.146975	0.0951327	0.101472	0.300092
V1	0.08	0.0856938	0.041373	0.264695	0.126639	0.0670687	0.150124	0.10031	0.218282
V1	0.085	0.0467182	0.029983	0.446509	0.0933083	0.0665862	0.171489	0.111363	0.0952365
V1	0.09	0.0421783	0.0580956	3.69682	0.043988	0.225729	0.0885566	0.0902086	0.104295
V1	0.095	0.0522233	0.0800996	15.8687	0.0528163	0.153528	0.0575066	0.0527695	0.122449
V1	0.1	0.0354996	0.0656064	7.39551	0.047705	0.181003	0.0585998	0.136646	0.0743606
V1	0.105	0.0974509	0.0576179	0.518075	0.0225471	0.109782	0.0585992	0.144853	0.109336
V1	0.11	0.0787792	0.0948684	0.275188	0.0202981	1.1638	0.140082	0.120144	0.318844
V1	0.115	0.057383	0.100495	0.117983	0.0368679	1.66091	0.122671	0.0919652	0.336643
V1	0.12	0.0103504	0.0200789	0.0513446	0.00980659	0.120471	0.0207928	0.0236404	0.0423456
V1	0.125	7.34512e-05	0.000855804	0.000751761	7.69135e-05	0.00415345	0.000537265	0.000558169	0.00026392
V1	0.13	3.38569e-06	1.43071e-05	3.71811e-05	2.81691e-06	0.000164223	1.73032e-05	9.66233e-06	2.1053e-05
V1	0.135	5.76057e-07	2.21826e-06	9.29983e-06	3.86091e-07	2.76316e-05	2.73385e-06	1.20288e-06	4.51494e-06
V1	0.14	1.52702e-07	6.2209e-07	3.60384e-06	9.24393e-08	7.22691e-06	7.09302e-07	2.9028e-07	1.4118e-06
V1	0.145	5.22633e-08	2.27044e-07	1.67855e-06	2.97404e-08	2.43703e-06	2.46036e-07	9.66599e-08	5.60028e-07
V1	0.15	2.20661e-08	9.78721e-08	8.54596e-07	1.18526e-08	9.73618e-07	9.96795e-08	4.22857e-08	2.53764e-07
V1	0.155	1.06086e-08	4.96988e-08	4.76629e-07	6.2331e-09	4.41022e-07	4.60431e-08	1.92039e-08	1.25915e-07
V1	0.16	5.7502e-09	2.60463e-08	2.81309e-07	3.16042e-09	2.18592e-07	2.36933e-08	1.20927e-08	6.97125e-08
V1	0.165	2.88161e-09	1.58883e-08	1.70415e-07	2.154e-09	1.1853e-07	1.31491e-08	6.67961e-09	4.10942e-08
V1	0.17	2.12145e-09	8.92445e-09	1.10357e-07	1.24119e-09	6.43518e-08	7.84116e-09	4.09703e-09	2.45014e-08
V1	0.175	1.31273e-09	6.12767e-09	7.24288e-08	1.03814e-09	4.12548e-08	4.60635e-09	2.79646e-09	1.6175e-08
V1	0.18	7.85599e-10	3.76045e-09	4.87504e-08	4.42038e-10	2.43947e-08	3.39266e-09	1.84641e-09	1.08714e-08
V1	0.185	7.36395e-10	2.81565e-09	3.31596e-08	8.27292e-10	1.72151e-08	1.98914e-09	1.5436e-09	7.51669e-09
V1	0.19	5.64235e-10	2.04022e-09	2.3497e-08	3.69715e-10	9.74876e-09	1.43248e-09	1.15834e-09	4.81005e-09
V1	0.195	2.97241e-10	1.59817e-09	1.83766e-08	3.35294e-10	7.81225e-09	1.0376e-09	8.59051e-10	3.94623e-09
V1	0.2	2.64729e-10	6.08909e-10	1.08731e-08	1.31616e-10	5.32658e-09	8.994e-10	5.49427e-10	2.93692e-09
V1	0.205	2.86383e-10	1.01624e-09	9.94381e-09	3.69722e-10	3.66259e-09	3.76504e-10	4.43249e-10	1.80554e-09
V1	0.21	2.0414e-10	4.29878e-10	6.44217e-09	7.89934e-11	2.71377e-09	4.00091e-10	3.35606e-10	2.10192e-09
V1	0.215	1.51971e-10	5.03878e-10	5.65394e-09	1.75401e-10	2.05743e-09	5.0669e-10	4.438e-10	1.18217e-09
V1	0.22	1.04257e-10	4.41241e-10	4.01856e-09	1.80601e-10	1.65677e-09	1.14657e-10	9.28024e-11	1.04064e-09
V1	0.225	3.21385e-10	2.82644e-10	3.28388e-09	9.83795e-11	1.14684e-09	3.37858e-10	3.91407e-10	1.12274e-09
V1	0.23	1.48889e-10	2.43249e-10	2.07614e-09	1.86551e-10	8.70165e-10	1.13588e-10	1.13288e-10	5.99488e-10
V1	0.235	1.6004e-10	3.07129e-10	3.21219e-09	1.65193e-10	1.1762e-09	3.74035e-10	2.75638e-10	9.05242e-10
V1	0.24	1.55094e-10	1.69853e-10	1.33238e-09	1.11911e-10	7.67852e-10	8.35569e-11	1.28203e-10	8.23156e-10
V1	0.245	1.06073e-10	2.86973e-10	1.97646e-09	1.03497e-10	6.32977e-10	9.28176e-11	1.21001e-10	4.04945e-10
V1	0.25	1.13375e-10	2.18112e-11	7.13955e-10	6.98746e-11	2.87688e-10	8.24742e-11	1.06704e-10	4.53389e-10

## Sheet: Figure6D2
seed	frequency	sub-01_run-1	sub-01_run-2	sub-02_run-1	sub-02_run-2	sub-02_run-5	sub-02_run-6	sub-03_run-1	sub-03_run-2	sub-04_run-1	sub-04_run-2	sub-04_run-3	sub-05_run-1	sub-05_run-2	sub-05_run-3	sub-05_run-4	sub-06_run-2	sub-06_run-5	sub-07_run-2	sub-07_run-3	sub-08_run-3	sub-09_run-2	sub-09_run-3	sub-10_run-1	sub-10_run-2	sub-10_run-3	sub-11_run-1	sub-11_run-2	sub-11_run-3
Cg	0	0.0298469	0.0125615	0.00566282	0.0227782	0.062303	0.0492646	0.0302772	0.016228	0.00284467	0.00720638	0.0324894	0.0293125	0.00560159	0.0425584	0.0570653	0.0841081	0.0251659	0.0504267	0.0181912	0.016682	0.0862591	0.0659821	0.0346153	0.0239125	0.048349	0.00776251	0.0189466	0.133535
Cg	0.005	0.0383578	0.0587017	0.0449558	0.021819	0.199377	0.236559	0.0665171	0.0725827	0.146358	0.0442948	0.0170086	0.172199	0.0368772	0.0188405	0.313979	0.0848843	0.199166	0.190382	0.279924	0.037694	0.0944101	0.395403	0.124741	0.0593616	0.693836	0.0674374	0.0631273	0.425013
Cg	0.01	0.365134	0.808578	0.45303	0.190763	3.66889	1.60668	1.07593	1.05548	1.05875	0.291502	0.10325	2.63242	0.631353	1.23555	3.36917	1.23846	1.3599	1.53753	1.81921	0.465771	1.89391	2.65264	1.5156	1.19517	4.80556	0.508156	0.811713	3.43192
Cg	0.015	0.996635	1.51995	0.669385	0.601704	5.16945	1.87023	2.94836	1.74335	1.13692	0.515404	0.855488	3.61549	1.30401	3.5659	3.25315	2.30523	1.76612	1.50794	2.2328	1.41772	2.09998	3.88871	1.18255	1.16981	4.30506	1.20123	1.49925	6.40569
Cg	0.02	1.87542	1.41967	0.494294	1.2384	2.02574	1.31078	3.83519	1.56806	1.37632	1.90311	1.1916	1.99685	1.5585	3.67764	1.72145	1.4322	1.23363	1.27947	1.59722	1.47557	1.14792	3.06115	0.275785	0.887071	2.83965	1.24879	1.45736	5.46566
Cg	0.025	1.91198	1.45602	0.290024	1.73149	1.53721	0.706181	3.71535	1.89333	1.43428	2.25123	0.406895	0.74272	2.61056	2.4157	2.8508	1.19138	1.40988	1.28895	2.04233	0.588659	1.42861	3.06777	0.231854	0.878739	2.49589	1.5017	1.39666	3.0124
Cg	0.03	1.58129	0.866774	0.298954	0.74253	2.15562	0.384113	3.35053	1.46783	1.32064	1.38205	0.479999	2.97132	1.30944	0.939766	5.82134	2.78234	1.12526	0.915066	2.37077	0.76709	1.52893	4.13923	0.460411	0.567988	2.37173	1.45647	1.84083	2.10837
Cg	0.035	1.32113	1.26643	0.261589	0.752617	1.31416	0.813854	1.44591	1.90266	0.842401	0.801547	0.441979	2.26957	1.69234	0.905042	4.49832	2.25372	1.20899	0.897789	1.00249	1.05934	1.2801	3.21745	1.08772	0.586153	2.13003	1.42697	1.17929	1.70607
Cg	0.04	1.40818	1.15169	0.312858	0.790067	1.93392	1.14319	1.65698	2.39299	1.36004	0.702713	0.522368	1.42557	2.2162	0.749037	5.03133	1.62869	1.87509	0.367069	0.606561	1.0272	0.59059	1.76626	1.21581	1.01789	1.81845	1.29277	1.48891	1.36293
Cg	0.045	1.1214	1.34925	0.395424	0.600833	2.90337	1.40932	3.14197	1.98122	1.31825	0.45682	0.69319	2.03917	1.17871	0.960468	7.12769	0.790358	1.24584	0.933996	1.12546	0.854337	0.695779	1.36036	1.09939	1.12554	0.932912	0.415809	1.06461	1.31079
Cg	0.05	1.98467	1.47511	0.353574	0.7666	2.92236	1.1585	3.97248	1.46258	1.11949	0.423338	0.895107	1.83975	2.41307	0.942792	8.2427	1.40601	0.875227	0.528497	1.26162	1.22323	0.902654	1.77943	0.752098	0.431604	0.995318	0.435625	0.795326	2.36395
Cg	0.055	2.45929	1.04183	0.361375	1.19898	4.455	0.881008	2.64869	1.25871	0.752396	0.761418	0.512643	1.49501	2.06479	0.961841	6.15161	1.55845	1.49142	0.651157	0.721304	0.735964	0.995948	1.30705	0.612467	0.674264	0.90057	0.538948	1.11251	2.53273
Cg	0.06	4.09359	0.609154	0.322238	0.98205	4.50451	1.26078	1.39431	0.65841	0.746366	1.40258	0.614214	2.54799	1.6111	0.985904	4.89255	1.0643	1.27358	0.764187	0.323259	0.456489	0.688496	0.418078	1.0211	1.12871	1.12826	0.448344	0.757421	2.03192
Cg	0.065	4.93532	0.91232	1.17799	0.638375	3.22588	2.49101	1.28749	0.811699	1.10341	1.00594	0.666981	4.24444	0.550847	0.891867	4.15161	0.645192	1.35063	0.565294	0.583724	0.814501	0.720683	0.361778	0.976078	0.788033	0.610663	0.436025	0.535361	1.65598
Cg	0.07	2.34427	1.26455	1.04316	0.59759	6.65961	2.53438	1.67233	1.0671	1.22657	0.599439	1.3544	3.59029	1.68327	0.664993	6.60904	0.468401	1.21552	0.682611	0.384885	1.31927	0.584152	0.487964	0.299042	1.19079	0.485984	0.400258	1.16124	0.8392
Cg	0.075	2.36874	1.16515	1.19865	2.5924	5.58425	2.69215	1.81236	1.31095	1.06807	1.27119	1.26264	0.910861	1.68257	1.36149	4.7461	0.816107	1.1963	0.345296	0.521966	0.870265	0.483977	0.625688	0.554019	1.02843	0.812922	0.343887	0.882659	1.09292
Cg	0.08	2.44349	1.00647	1.11681	3.49119	2.64271	1.93334	0.72981	1.79588	1.05333	0.74607	0.64579	1.08225	0.932071	1.81292	4.8514	1.06091	1.12829	0.670942	0.377149	0.681436	0.333061	0.46456	0.946473	0.787844	0.493725	0.362398	0.712273	1.09489
Cg	0.085	1.72885	1.33329	0.482224	2.5255	2.29112	1.81405	0.798328	1.02693	0.955255	0.190259	0.401797	2.4593	1.06324	3.32701	6.55811	0.56806	1.18473	0.832611	0.327379	0.439718	0.282954	0.99095	0.896453	0.513793	0.417202	0.266001	0.597939	1.02697
Cg	0.09	1.45468	0.863444	0.397251	3.02654	1.87522	3.63444	0.48506	0.406846	0.807785	0.993227	0.58353	2.53319	1.56537	2.44883	6.21328	0.364997	0.974382	1.01836	0.362201	0.526105	0.556623	0.683865	0.955423	0.868546	0.555066	0.37812	0.598679	1.31255
Cg	0.095	2.74595	0.407528	0.810977	1.96541	2.17863	2.12383	0.734901	0.6657	1.12683	0.368653	0.966401	1.25465	2.06469	2.12046	2.90653	0.681573	1.19347	0.619057	0.656682	0.552874	0.278203	0.243892	0.873232	0.975442	0.691004	0.287498	0.42607	1.08616
Cg	0.1	2.16945	1.54257	0.68794	0.920323	2.25188	1.35698	0.896605	0.990742	1.7192	0.504411	0.913913	1.51746	1.75043	1.6371	2.90355	1.00028	1.25766	0.303028	0.561953	0.525383	0.367487	0.214613	0.954787	0.324325	0.544162	0.512016	0.452801	0.788247
Cg	0.105	1.49193	1.22802	1.0533	0.862373	1.95052	2.21512	0.563347	0.833924	0.589878	0.316185	0.822646	1.04773	1.96007	0.996528	3.30745	0.773602	1.18999	0.456011	0.605945	0.409417	0.45343	0.379742	0.778319	0.171479	0.884055	0.411786	0.249105	1.61123
Cg	0.11	1.60056	0.599697	1.33153	1.10944	2.68498	3.15095	0.382979	1.54032	0.700339	0.652063	1.27827	0.695434	1.31928	0.614558	4.11441	0.781064	1.05189	0.54244	0.571336	0.257844	0.346391	0.407664	0.623708	0.292794	1.52592	0.291311	0.575038	3.66097
Cg	0.115	1.33836	1.15553	1.15582	0.782586	2.74484	2.03116	0.307736	1.62129	1.16351	0.899463	1.13209	0.888292	0.387245	0.673461	6.4651	0.557176	0.840184	0.470819	0.254319	0.1477	0.511213	0.489425	0.926128	0.250936	1.31953	0.40619	0.520403	2.71059
Cg	0.12	0.841519	1.54472	0.397404	0.689666	2.62808	1.21436	0.560157	0.65644	1.13771	0.368208	0.950305	1.04353	0.709718	1.04165	5.41319	0.499203	0.854857	0.340683	0.382871	0.294091	0.561287	0.737853	0.814446	0.286614	0.941286	0.35654	0.523329	0.874179
Cg	0.125	1.25501	1.94992	0.759907	1.05633	1.35885	2.5743	0.524154	0.79833	0.646813	0.635673	0.650426	0.509021	0.735577	0.850045	4.68868	0.480824	1.20715	0.287633	0.70601	0.323517	0.404554	0.7642	0.532652	0.303387	0.661892	0.251893	0.427363	0.642369
Cg	0.13	1.0145	0.594718	1.11973	1.44361	2.25358	2.94131	0.610952	1.07154	0.83831	1.15181	0.597693	1.04943	1.00372	1.00425	10.3554	0.669964	1.6448	0.223093	0.582649	0.285126	0.487911	0.503077	0.457131	0.336204	0.661753	0.226032	0.206733	0.749768
Cg	0.135	1.06518	0.993336	1.51141	1.24032	2.82965	2.76253	0.56695	1.86428	0.99788	0.998827	0.885857	1.27778	0.774846	1.27626	4.34338	0.687331	1.14698	0.4247	0.231944	0.344184	0.538561	0.43533	0.582891	0.249859	0.54918	0.179021	0.206971	0.798235
Cg	0.14	0.756114	0.626413	1.10279	1.1521	2.6338	5.17278	0.555466	1.36899	0.57958	0.778967	0.781799	1.12308	0.739344	1.41338	1.26671	0.577524	0.605544	0.293673	0.181002	0.379918	0.470519	0.353459	0.376627	0.308152	0.567001	0.118205	0.285633	1.14748
Cg	0.145	0.785379	1.4537	0.4033	0.98123	2.48548	4.35151	0.460458	0.342286	0.694364	0.609785	0.561349	1.29512	0.904409	1.21976	3.04225	0.380303	0.507182	0.290427	0.165944	0.323462	0.483084	0.360828	0.410368	0.332986	0.371954	0.151131	0.257521	0.813536
Cg	0.15	0.554163	0.792613	0.230874	0.823891	1.03642	2.10844	0.239819	0.0537886	0.401756	0.354237	0.226643	0.890621	0.317158	0.51459	1.7165	0.0384069	0.12046	0.077515	0.0735597	0.165972	0.276136	0.172394	0.395152	0.162118	0.114952	0.119873	0.0983039	0.234486
Cg	0.155	0.0539422	0.024655	0.0169742	0.052433	0.0813203	0.0635366	0.0256065	0.00151484	0.013345	0.0242624	0.0149568	0.0548235	0.0193035	0.0230168	0.044969	0.000867737	0.00592554	0.00284063	0.00171111	0.0150276	0.0174819	0.00620228	0.0184009	0.00504817	0.00817939	0.00981428	0.00770299	0.00837319
Cg	0.16	0.000528681	0.000579849	0.000199627	0.000364752	0.000748522	0.00126351	0.000233359	3.08467e-05	0.000248713	0.000210312	0.000148184	0.000560358	0.000232024	0.000272193	0.00092267	2.48479e-05	6.52792e-05	3.42425e-05	4.91422e-05	0.000107725	0.000186115	7.02651e-05	0.00022105	8.86837e-05	9.35484e-05	8.1448e-05	8.70862e-05	0.000119039
Cg	0.165	6.25884e-05	6.92938e-05	2.25313e-05	3.36663e-05	8.26402e-05	0.000158484	2.85043e-05	5.08786e-06	2.86709e-05	2.12735e-05	1.60095e-05	5.64767e-05	3.04647e-05	3.30433e-05	0.000100897	4.69176e-06	7.80048e-06	4.55901e-06	6.93751e-06	1.04029e-05	2.189e-05	6.88578e-06	2.22398e-05	1.00636e-05	1.18501e-05	7.9108e-06	1.07159e-05	1.47324e-05
Cg	0.17	1.46616e-05	1.49541e-05	4.99022e-06	6.9202e-06	1.84826e-05	3.68147e-05	7.03352e-06	1.48471e-06	6.24848e-06	4.48957e-06	3.42002e-06	1.1503e-05	7.55801e-06	7.86654e-06	2.02627e-05	1.45217e-06	1.9284e-06	1.13186e-06	1.74559e-06	2.17551e-06	5.13074e-06	1.29029e-06	4.43428e-06	2.20857e-06	2.91889e-06	1.53675e-06	2.56456e-06	3.50125e-06
Cg	0.175	4.79548e-06	4.51705e-06	1.56912e-06	2.17464e-06	5.83292e-06	1.1931e-05	2.47088e-06	5.57176e-07	1.94494e-06	1.37363e-06	1.05868e-06	3.39887e-06	2.60806e-06	2.61826e-06	5.7164e-06	5.91427e-07	6.65031e-07	3.78186e-07	5.9713e-07	6.81387e-07	1.69786e-06	3.47801e-07	1.28809e-06	6.80485e-07	9.93008e-07	4.40687e-07	8.56061e-07	1.18245e-06
Cg	0.18	1.9551e-06	1.68718e-06	6.11886e-07	8.63044e-07	2.3025e-06	4.74086e-06	1.05018e-06	2.50173e-07	7.61137e-07	5.33668e-07	3.94187e-07	1.29266e-06	1.07112e-06	1.0699e-06	2.04899e-06	2.72703e-07	3.07071e-07	1.59109e-07	2.46179e-07	2.72317e-07	6.82821e-07	1.17684e-07	4.76857e-07	2.67867e-07	4.05024e-07	1.53926e-07	3.52934e-07	4.82126e-07
Cg	0.185	9.03827e-07	7.22572e-07	2.77673e-07	4.20879e-07	1.02882e-06	2.21189e-06	5.13536e-07	1.18496e-07	3.43974e-07	2.40189e-07	1.79159e-07	5.61166e-07	5.08578e-07	5.12393e-07	8.35776e-07	1.50743e-07	1.46358e-07	7.50217e-08	1.19619e-07	1.26114e-07	3.2622e-07	4.66203e-08	2.13349e-07	1.17015e-07	1.94045e-07	6.69551e-08	1.63255e-07	2.33408e-07
Cg	0.19	4.70336e-07	3.62664e-07	1.43457e-07	2.24746e-07	5.34976e-07	1.11161e-06	2.74002e-07	6.55292e-08	1.75931e-07	1.23972e-07	8.33948e-08	2.77735e-07	2.5985e-07	2.54625e-07	3.88314e-07	8.21204e-08	8.84574e-08	3.8336e-08	6.237e-08	6.67663e-08	1.59927e-07	2.06692e-08	1.00918e-07	6.37735e-08	1.03844e-07	3.13348e-08	8.96774e-08	1.22384e-07
Cg	0.195	2.53927e-07	1.84684e-07	8.01393e-08	1.3261e-07	2.86935e-07	6.33634e-07	1.49673e-07	3.90221e-08	9.46515e-08	6.78372e-08	4.89732e-08	1.52701e-07	1.46458e-07	1.49035e-07	2.06096e-07	5.01541e-08	4.88567e-08	2.34703e-08	3.4343e-08	3.80635e-08	9.1283e-08	1.09456e-08	5.96296e-08	3.31254e-08	5.30083e-08	1.67055e-08	4.86465e-08	7.27878e-08
Cg	0.2	1.52773e-07	1.09615e-07	4.59564e-08	8.13042e-08	1.59859e-07	3.67217e-07	9.8801e-08	2.09439e-08	5.58237e-08	4.09319e-08	2.82586e-08	8.68314e-08	8.49185e-08	8.57261e-08	1.03588e-07	3.38389e-08	3.1293e-08	1.3328e-08	2.26671e-08	2.40635e-08	5.59386e-08	5.69331e-09	3.13773e-08	2.0844e-08	3.40982e-08	1.01129e-08	3.0627e-08	4.45689e-08
Cg	0.205	9.52289e-08	6.24204e-08	2.8354e-08	5.54863e-08	9.96754e-08	2.44477e-07	5.40452e-08	1.44727e-08	3.58118e-08	2.66576e-08	1.66726e-08	5.30815e-08	5.37322e-08	5.23585e-08	6.52115e-08	2.21055e-08	2.14396e-08	9.9747e-09	1.42679e-08	1.39061e-08	3.29109e-08	4.24851e-09	2.211e-08	1.20336e-08	2.0202e-08	6.32645e-09	1.83655e-08	2.85424e-08
Cg	0.21	6.15e-08	4.22934e-08	1.9758e-08	3.8351e-08	6.43509e-08	1.51902e-07	3.78042e-08	8.95364e-09	1.89348e-08	1.61315e-08	1.18692e-08	3.1647e-08	3.21097e-08	3.60996e-08	3.80897e-08	1.52854e-08	1.23557e-08	5.28955e-09	9.14712e-09	9.57144e-09	2.18793e-08	1.60623e-09	1.33792e-08	8.159e-09	1.34013e-08	3.77855e-09	1.33987e-08	1.75612e-08
Cg	0.215	4.26393e-08	2.74973e-08	1.35383e-08	2.79216e-08	3.9559e-08	1.14395e-07	2.31408e-08	6.51486e-09	1.29431e-08	1.16244e-08	8.7217e-09	2.09534e-08	2.14686e-08	2.28128e-08	2.15411e-08	1.03248e-08	9.23868e-09	4.40017e-09	6.65212e-09	7.22175e-09	1.40027e-08	1.55802e-09	8.69736e-09	6.07214e-09	7.81076e-09	2.63509e-09	8.88914e-09	1.35671e-08
Cg	0.22	2.63669e-08	1.83271e-08	9.69686e-09	2.15359e-08	2.93155e-08	7.88892e-08	1.44707e-08	5.389e-09	9.34877e-09	7.99216e-09	5.43717e-09	1.35886e-08	1.41161e-08	1.59764e-08	1.51585e-08	8.26229e-09	6.03792e-09	3.38921e-09	5.14573e-09	5.14686e-09	9.83002e-09	7.57666e-10	5.75394e-09	3.68256e-09	6.07507e-09	2.02442e-09	6.61213e-09	7.45052e-09
Cg	0.225	2.33587e-08	1.54496e-08	5.809e-09	1.46739e-08	1.89494e-08	6.08341e-08	1.09148e-08	2.44663e-09	5.08906e-09	6.20882e-09	4.73565e-09	9.38279e-09	9.97687e-09	1.17411e-08	9.25906e-09	6.19049e-09	4.637e-09	1.80042e-09	3.1623e-09	3.6937e-09	7.19204e-09	6.57451e-10	5.04429e-09	3.28431e-09	4.26234e-09	1.60947e-09	4.86917e-09	7.76964e-09
Cg	0.23	1.43617e-08	1.07372e-08	5.92793e-09	1.4918e-08	1.46169e-08	4.90216e-08	5.60564e-09	2.69856e-09	3.46705e-09	5.0549e-09	4.3166e-09	5.78116e-09	7.99958e-09	8.67512e-09	5.07224e-09	5.07022e-09	3.81892e-09	1.83229e-09	3.44674e-09	2.43084e-09	5.89785e-09	8.60838e-10	3.06424e-09	2.20403e-09	2.59177e-09	9.934e-10	4.27201e-09	5.09268e-09
Cg	0.235	1.35632e-08	7.16736e-09	4.14811e-09	9.91112e-09	1.06056e-08	3.80234e-08	4.45112e-09	2.7863e-09	2.2856e-09	3.77969e-09	2.93097e-09	5.0419e-09	5.21914e-09	7.41694e-09	4.46455e-09	3.58459e-09	2.11583e-09	1.84994e-09	2.81618e-09	2.47005e-09	4.01018e-09	3.66178e-10	2.95924e-09	1.63926e-09	2.83747e-09	1.14417e-09	3.44177e-09	4.25927e-09
Cg	0.24	9.64383e-09	8.89714e-09	3.22271e-09	1.1133e-08	1.07761e-08	3.80521e-08	2.16756e-09	1.60623e-09	1.34202e-09	3.62675e-09	2.80369e-09	2.73558e-09	4.05474e-09	4.92689e-09	2.57045e-09	3.38026e-09	1.56094e-09	1.7409e-09	2.28573e-09	1.88853e-09	3.00562e-09	2.97767e-10	2.18886e-09	1.67973e-09	1.48698e-09	1.02949e-09	3.05971e-09	4.38649e-09
Cg	0.245	9.59655e-09	5.84402e-09	3.6986e-09	8.48314e-09	5.85014e-09	3.29423e-08	2.21592e-09	1.75674e-09	1.00983e-09	2.87285e-09	2.58899e-09	2.38695e-09	3.66842e-09	4.92675e-09	1.54722e-09	3.288e-09	1.52359e-09	7.84888e-10	1.75901e-09	1.65482e-09	3.40139e-09	2.32161e-10	1.90495e-09	1.55091e-09	1.73962e-09	6.79179e-10	2.75902e-09	1.85468e-09
Cg	0.25	4.07653e-09	3.33978e-09	1.32108e-09	5.12426e-09	3.90253e-09	1.52083e-08	3.4041e-10	5.77763e-10	4.06697e-10	1.54295e-09	1.42249e-09	9.63305e-10	1.5203e-09	1.96209e-09	5.71802e-10	1.40618e-09	7.77096e-10	6.36886e-10	1.05331e-09	9.77762e-10	1.18683e-09	1.01982e-10	8.90172e-10	4.70045e-10	6.91408e-10	4.51352e-10	1.28833e-09	1.79109e-09
V1	0	0.0113754	0.00669353	0.0118099	0.07292	0.0341314	0.0515266	0.0794042	0.046533	0.005663	0.0065612	0.0274295	0.00561668	0.0158705	0.013453	0.0403333	0.0846902	0.0131114	0.0266478	0.0152501	0.0339298	0.183254	0.0753217	0.0083306	0.00627751	0.0287792	0.00703511	0.0104533	0.0927678
V1	0.005	0.0621775	0.0340266	0.0684361	0.116955	0.0833535	0.0995976	0.254836	0.27467	0.118511	0.147103	0.0548466	0.104957	0.0161485	0.00666788	0.116017	0.0678407	0.183347	0.191371	0.130372	0.0176991	0.14321	0.384446	0.0520572	0.0133066	0.355125	0.0822735	0.0336441	0.107822
V1	0.01	1.14598	0.475936	0.811397	1.4889	1.7956	1.85887	2.22508	2.48405	1.4427	1.10115	0.485317	1.34174	0.313943	0.602847	1.61753	0.792375	1.35509	1.04212	1.03174	0.242702	3.31265	2.7839	0.471019	0.539888	2.81355	0.736691	0.363444	1.59539
V1	0.015	2.96319	1.31037	0.716912	1.52067	3.11808	2.628	7.09182	1.24103	3.34924	0.797389	1.02531	1.33268	1.07386	1.89721	3.17041	1.13269	1.46281	1.02824	1.27615	0.698876	4.01254	3.46099	0.552198	0.995359	1.38034	1.31098	0.848365	4.31213
V1	0.02	3.23315	1.16424	0.547162	1.53988	1.32944	1.18262	8.24951	1.60365	3.4061	2.58603	1.39651	1.06781	1.37017	2.23016	2.24529	1.12047	1.20842	0.999149	1.26839	1.43209	1.73269	3.9591	0.477818	1.20053	0.665418	1.12165	0.849427	3.45187
V1	0.025	3.13934	1.23138	0.571083	1.96542	0.900841	0.581429	7.79659	2.70426	3.62994	2.57053	0.50175	1.269	1.75645	1.57369	2.07722	0.997632	0.912495	0.951749	1.15488	2.05469	2.33765	5.08304	0.771446	1.27142	1.28765	1.83128	0.880924	2.50268
V1	0.03	1.16969	0.363104	0.97186	1.24594	1.371	0.77976	5.63229	3.10634	3.51438	1.91475	0.59457	1.84433	0.878692	0.777086	3.46171	1.09478	0.87222	0.454481	1.05218	1.57209	3.25202	4.26875	1.13984	1.1278	1.64182	0.960924	1.20276	2.02474
V1	0.035	1.81102	1.23504	0.5771	0.96341	1.43515	0.503725	2.62025	2.94203	1.52064	1.25827	0.484562	1.23092	1.38017	1.05431	1.88083	1.97345	0.655623	0.887111	0.963746	1.26681	3.53269	2.30189	2.03092	1.54468	1.97812	1.03557	0.829868	1.726
V1	0.04	1.81608	1.33233	0.260182	1.14976	1.91196	0.521149	3.99829	3.23598	2.49082	1.32665	0.576443	1.19996	1.80307	0.977284	2.36454	1.90287	0.856892	0.47055	0.657496	1.27313	1.71333	1.61005	1.62455	1.58382	1.25835	0.970563	0.999271	1.75332
V1	0.045	1.57593	1.4339	1.15005	1.30649	3.36828	0.696025	6.42372	1.57142	3.14669	0.970005	1.22911	1.77307	0.707558	0.64772	4.03875	1.08492	0.926092	0.697369	0.657508	1.23317	1.46502	2.32589	0.776421	1.39259	1.29959	0.537864	0.615611	1.13297
V1	0.05	3.40414	1.93544	0.816902	1.22651	3.25171	0.518292	6.28416	2.16653	2.74017	0.680111	2.28766	0.956147	1.01929	0.512304	5.47265	1.41182	0.474339	0.344423	1.09316	1.19283	1.80423	2.02301	0.913273	0.52747	1.29503	0.386833	0.486093	1.78625
V1	0.055	3.4399	3.80186	0.467506	1.32136	3.75146	0.966216	5.51758	1.91788	1.92039	1.01382	1.77749	0.637011	1.16874	0.784794	4.71699	1.24096	1.00693	0.829896	0.997857	1.01017	1.38765	1.43895	1.12559	0.293627	1.1155	0.402585	1.20711	2.5198
V1	0.06	5.43928	2.10906	0.485388	1.55531	2.5549	2.44744	4.64362	0.668471	0.985701	2.39478	1.09019	0.976862	1.20893	0.908277	4.37348	0.96606	1.04538	0.873003	1.16517	0.661225	0.874492	1.27142	1.55689	0.720036	0.94911	0.456647	0.93211	1.69533
V1	0.065	4.95222	1.87299	1.13856	1.25012	2.05479	3.17328	3.26659	1.40896	1.44845	2.06918	0.779644	1.6931	0.686997	0.784543	2.65748	0.468003	1.57772	0.414137	1.36007	1.48589	1.49234	0.907468	1.24315	1.12959	0.822778	0.7281	0.37043	1.44366
V1	0.07	2.9666	2.89626	1.19035	1.348	7.60084	2.68702	2.33126	1.61544	1.65725	1.44721	0.883353	1.6823	0.958863	0.616153	2.93072	0.22449	1.17122	0.578504	0.344432	1.44352	1.19455	0.805435	0.916507	1.65051	0.424339	0.611171	0.509924	1.07525
V1	0.075	3.23005	2.51729	1.82333	2.77897	6.2438	2.22504	2.93026	2.39008	1.75035	2.60526	1.04494	0.473343	1.01382	0.405099	2.52137	0.811303	1.1441	0.325951	0.512506	1.29991	0.914301	0.928185	0.942985	1.51806	0.605512	0.580642	0.343136	1.40375
V1	0.08	3.68051	1.22836	1.35721	5.75533	2.73868	1.51963	3.05835	2.79442	1.56216	2.57821	0.742932	0.603599	0.695604	0.84331	2.94906	1.18565	1.12543	0.279221	0.671076	1.43865	0.840938	0.815615	0.818314	0.890561	0.557193	0.354568	0.407651	1.11403
V1	0.085	3.14935	1.18019	0.694856	3.77104	2.74643	2.34119	3.01968	1.8762	2.80713	1.43626	0.515922	1.1098	1.01852	1.87163	3.02782	0.810294	0.789015	0.385609	0.674862	1.27565	1.12497	1.26332	0.997263	0.648685	0.656947	0.280683	0.767143	1.11296
V1	0.09	3.13599	1.33523	0.484643	3.79809	1.22765	2.76398	1.62184	0.921556	2.32605	2.92712	0.662442	1.19589	1.07753	0.978598	3.16866	0.583309	1.24293	0.422001	0.430498	0.595493	1.13726	1.0482	1.03284	1.37817	1.10867	0.121557	0.653053	1.65237
V1	0.095	3.49964	1.10689	1.181	2.16832	0.8121	2.02037	1.2243	0.488393	2.41169	1.05852	1.06168	0.782607	1.21271	0.917264	2.2454	0.535902	1.28491	0.385537	0.48475	0.655456	0.589595	0.235309	0.93663	1.25634	0.948743	0.337031	0.387007	1.20654
V1	0.1	2.13385	0.855451	1.25439	0.973873	1.14641	1.48698	1.11276	1.49748	3.76665	1.51218	1.11453	1.08727	1.06409	0.962597	2.75122	0.546892	1.66232	0.24913	0.329873	0.459171	0.894783	0.160492	0.783082	0.33151	0.455785	0.575414	0.344684	0.553299
V1	0.105	1.48254	0.913135	1.45667	1.38562	1.77419	1.47799	1.30171	1.43607	1.29126	1.02621	0.870306	1.09692	1.06171	0.489783	2.81058	0.458742	0.885872	0.526406	0.642403	0.310549	0.647347	0.508828	0.338026	0.142452	0.6153	0.432518	0.412275	1.29565
V1	0.11	1.87531	0.445775	1.48007	1.51201	2.10213	1.61341	1.01027	0.939253	0.837864	1.15046	1.369	0.475251	0.755431	0.456259	2.87524	0.566199	0.781654	0.328064	0.548958	0.374445	0.460556	0.727766	0.647561	0.247798	1.69969	0.161317	0.543252	2.34739
V1	0.115	1.53679	0.707563	1.31495	0.63491	2.56506	1.80704	0.422001	1.46653	1.23599	1.10221	1.14538	0.721181	0.216968	0.710342	4.95099	0.554688	0.863806	0.220892	0.273199	0.365877	0.491472	0.81808	0.494257	0.357768	2.10346	0.117448	0.284213	1.08184
V1	0.12	0.94184	1.04456	0.570601	0.369987	1.16917	1.36997	1.08173	1.28223	1.24888	0.351714	1.22654	1.21781	0.605277	0.608333	3.34194	0.346941	0.552624	0.124631	0.133938	0.466141	0.550407	0.944117	0.477767	0.405249	1.48185	0.216911	0.229586	0.339532
V1	0.125	0.903867	1.66001	0.877634	1.1417	0.570577	0.910625	0.99847	0.661938	1.1609	0.516888	1.19863	0.594261	0.857262	0.509158	2.427	0.409328	1.1904	0.249093	0.134463	0.367168	0.876562	0.665267	0.581832	0.414385	0.588395	0.264236	0.350249	0.539514
V1	0.13	0.767531	1.72616	0.980014	1.90933	1.31136	1.57923	0.851397	0.850743	0.933117	1.27926	0.647124	0.575784	0.677908	0.743415	5.59143	0.566338	1.54533	0.306577	0.155944	0.330926	0.810507	0.402653	0.543289	0.321198	0.623523	0.239915	0.419474	0.545611
V1	0.135	1.11266	1.76251	1.23187	1.86806	1.93567	2.19899	0.872856	1.27378	1.0753	1.38093	0.48636	0.924967	0.580456	0.509454	2.65976	0.499695	1.71842	0.199131	0.138732	0.322395	0.54866	0.288834	0.550227	0.258079	1.344	0.280872	0.239097	0.492791
V1	0.14	1.35873	0.721163	1.22083	2.15768	1.74531	4.42612	0.60173	0.539926	1.08353	0.881704	0.812084	0.566974	0.479048	0.643204	1.07664	0.385587	0.89529	0.174173	0.158504	0.36871	0.387513	0.206787	0.697505	0.224677	0.579684	0.117128	0.200201	0.781828
V1	0.145	2.06581	1.62806	1.17732	0.583837	1.68491	3.70718	0.67991	0.292786	1.28096	0.541263	1.17879	0.549211	0.4972	0.557781	2.46595	0.427403	0.81443	0.113546	0.119479	0.406199	0.339129	0.296747	0.562851	0.363706	0.49306	0.0894609	0.186726	0.670702
V1	0.15	1.16908	1.05337	0.362933	0.585668	0.900245	2.186	0.487871	0.0704801	0.829944	0.321945	0.392647	0.468477	0.162128	0.15306	1.36479	0.13637	0.176332	0.057147	0.0476403	0.329287	0.265983	0.0889833	0.229945	0.181851	0.23223	0.0820186	0.035997	0.234985
V1	0.155	0.0635379	0.0596127	0.0078747	0.0418782	0.0740351	0.0860915	0.0435353	0.000776971	0.0331638	0.017874	0.012581	0.0365056	0.0102663	0.00560055	0.0366034	0.00343787	0.0108253	0.0059102	0.00118531	0.0292915	0.0203336	0.00123484	0.00577355	0.0090956	0.0100026	0.00503509	0.00126036	0.00890776
V1	0.16	0.000690681	0.000786282	0.000208975	0.000279034	0.000608627	0.00135852	0.000428048	1.68201e-05	0.00053986	0.000197498	0.000197764	0.000314552	0.000156226	0.000119996	0.000650326	6.37993e-05	0.000159046	5.17206e-05	2.20138e-05	0.000216938	0.00020071	1.79117e-05	9.0656e-05	0.000123036	0.000134436	4.75447e-05	1.6383e-05	0.000111984
V1	0.165	7.96032e-05	8.74461e-05	3.18335e-05	2.90937e-05	6.18481e-05	0.000160427	4.99626e-05	2.47631e-06	6.06099e-05	2.24477e-05	2.74972e-05	3.03836e-05	2.18567e-05	1.78614e-05	6.80488e-05	8.28951e-06	2.3284e-05	5.53667e-06	3.2257e-06	2.01559e-05	2.24324e-05	2.32934e-06	1.03113e-05	1.35579e-05	1.51706e-05	4.51451e-06	1.92114e-06	1.25153e-05
V1	0.17	1.82194e-05	1.8555e-05	8.28605e-06	7.25077e-06	1.30796e-05	3.59712e-05	1.18178e-05	6.93035e-07	1.28685e-05	5.20121e-06	6.83363e-06	6.09124e-06	5.51182e-06	4.57242e-06	1.30786e-05	1.95185e-06	6.22191e-06	1.1677e-06	8.5286e-07	3.97867e-06	5.09169e-06	6.48241e-07	2.20807e-06	2.87968e-06	3.35988e-06	8.91626e-07	4.44757e-07	2.69042e-06
V1	0.175	5.84288e-06	5.58557e-06	2.87737e-06	2.74812e-06	3.99036e-06	1.13636e-05	4.03979e-06	2.68465e-07	3.91493e-06	1.6988e-06	2.34344e-06	1.79431e-06	1.89367e-06	1.5595e-06	3.52706e-06	6.45868e-07	2.21126e-06	3.58134e-07	3.09211e-07	1.16518e-06	1.64433e-06	2.49326e-07	6.84045e-07	8.49493e-07	1.03796e-06	2.69793e-07	1.45353e-07	8.31825e-07
V1	0.18	2.38603e-06	2.10688e-06	1.20262e-06	1.24875e-06	1.53218e-06	4.47018e-06	1.70556e-06	1.22221e-07	1.48616e-06	6.87785e-07	9.48165e-07	6.79463e-07	7.71294e-07	6.32108e-07	1.20988e-06	2.64556e-07	9.56998e-07	1.32037e-07	1.32476e-07	4.33988e-07	6.53608e-07	1.31691e-07	2.59552e-07	3.20313e-07	4.1054e-07	1.05257e-07	6.39769e-08	3.14477e-07
V1	0.185	1.09743e-06	9.04333e-07	5.73161e-07	6.64531e-07	6.83149e-07	2.03153e-06	8.27837e-07	6.40069e-08	6.48303e-07	3.28488e-07	4.54159e-07	2.96948e-07	3.6265e-07	2.98699e-07	4.7997e-07	1.30524e-07	4.55639e-07	5.86802e-08	6.78863e-08	1.90574e-07	3.04442e-07	7.20785e-08	1.17578e-07	1.38395e-07	1.79857e-07	4.94727e-08	3.29747e-08	1.42462e-07
V1	0.19	5.72063e-07	4.54664e-07	2.95478e-07	3.74887e-07	3.46432e-07	1.02373e-06	4.43325e-07	3.64968e-08	3.27723e-07	1.76853e-07	2.30587e-07	1.43677e-07	1.80667e-07	1.46425e-07	2.21699e-07	6.52738e-08	2.52553e-07	2.63757e-08	3.50557e-08	9.50139e-08	1.54832e-07	4.45675e-08	5.60724e-08	6.99769e-08	9.53277e-08	2.36265e-08	1.70898e-08	7.2721e-08
V1	0.195	3.08107e-07	2.30688e-07	1.70024e-07	2.37373e-07	1.89404e-07	5.73041e-07	2.47226e-07	2.2126e-08	1.73792e-07	9.94385e-08	1.28662e-07	8.1354e-08	1.00612e-07	8.21115e-08	1.14953e-07	4.02325e-08	1.40989e-07	1.48235e-08	2.18471e-08	5.09289e-08	8.32455e-08	2.93411e-08	3.20094e-08	3.56877e-08	5.0542e-08	1.42981e-08	1.20553e-08	4.22951e-08
V1	0.2	1.92004e-07	1.38053e-07	9.94263e-08	1.50982e-07	1.05472e-07	3.32101e-07	1.58046e-07	1.54579e-08	1.00003e-07	6.09623e-08	7.80768e-08	4.54145e-08	5.77698e-08	4.6816e-08	6.11097e-08	2.56835e-08	8.08576e-08	8.36525e-09	1.34436e-08	3.01888e-08	5.21799e-08	1.99019e-08	1.78066e-08	2.13684e-08	2.77056e-08	8.42565e-09	7.44781e-09	2.31848e-08
V1	0.205	1.18048e-07	7.7655e-08	6.0953e-08	1.02956e-07	6.70327e-08	2.14855e-07	9.49977e-08	9.67222e-09	6.26015e-08	4.25684e-08	4.82992e-08	2.72578e-08	3.39909e-08	2.78636e-08	4.07452e-08	1.47861e-08	5.67409e-08	5.17451e-09	9.9257e-09	1.70825e-08	3.02248e-08	1.55982e-08	1.045e-08	1.26386e-08	1.81926e-08	5.49138e-09	5.34286e-09	1.56665e-08
V1	0.21	7.5993e-08	4.95182e-08	4.2643e-08	7.27343e-08	4.43129e-08	1.33353e-07	6.14716e-08	6.54533e-09	3.44033e-08	2.68734e-08	3.246e-08	1.58019e-08	2.06664e-08	1.78719e-08	2.38238e-08	1.20245e-08	3.12357e-08	2.51777e-09	5.08447e-09	1.14375e-08	2.03719e-08	9.45637e-09	6.79237e-09	7.77707e-09	1.21809e-08	3.11558e-09	3.54524e-09	9.28996e-09
V1	0.215	5.32185e-08	3.28382e-08	2.75957e-08	5.30701e-08	2.92066e-08	9.93197e-08	4.1074e-08	5.09714e-09	2.50581e-08	1.98025e-08	2.16459e-08	1.11505e-08	1.36073e-08	1.09729e-08	1.65586e-08	8.70688e-09	2.25611e-08	2.20799e-09	4.65857e-09	6.86635e-09	1.18797e-08	8.80336e-09	4.26925e-09	5.47246e-09	6.86176e-09	2.30127e-09	3.14285e-09	6.77649e-09
V1	0.22	3.56635e-08	2.02444e-08	2.08887e-08	3.95772e-08	2.06379e-08	6.74816e-08	2.46523e-08	4.22812e-09	1.64483e-08	1.38949e-08	1.53488e-08	6.47535e-09	8.22967e-09	7.25798e-09	1.08019e-08	6.01833e-09	1.42908e-08	1.15828e-09	2.88469e-09	4.84423e-09	9.68215e-09	6.22638e-09	2.88806e-09	3.33704e-09	5.58259e-09	1.24754e-09	2.0253e-09	4.0956e-09
V1	0.225	2.85817e-08	1.54458e-08	1.29421e-08	3.18891e-08	1.4517e-08	4.89445e-08	1.71063e-08	3.06506e-09	1.20267e-08	1.25253e-08	1.05939e-08	3.95887e-09	5.33305e-09	4.81308e-09	9.91908e-09	5.14704e-09	1.14885e-08	1.08215e-09	3.19154e-09	3.70441e-09	5.95838e-09	4.75685e-09	1.91433e-09	3.10096e-09	3.2737e-09	1.05672e-09	2.27635e-09	3.36158e-09
V1	0.23	1.77191e-08	9.51405e-09	1.24969e-08	2.47351e-08	1.25424e-08	4.17539e-08	1.10768e-08	1.95639e-09	7.96184e-09	8.85497e-09	1.07927e-08	3.04994e-09	4.04993e-09	4.10635e-09	6.54947e-09	4.22304e-09	6.9669e-09	6.88467e-10	1.41974e-09	1.75526e-09	5.70903e-09	4.80086e-09	1.45852e-09	1.43783e-09	2.70485e-09	9.27675e-10	1.40488e-09	2.92003e-09
V1	0.235	1.81602e-08	7.03654e-09	9.03473e-09	2.24927e-08	8.75679e-09	2.92774e-08	7.84229e-09	2.92579e-09	5.56193e-09	8.49081e-09	5.6215e-09	2.54414e-09	2.15465e-09	2.43849e-09	8.01336e-09	3.6493e-09	5.50472e-09	7.52322e-10	2.33506e-09	1.65665e-09	3.67014e-09	3.86019e-09	1.11369e-09	1.84064e-09	2.19938e-09	4.74222e-10	1.40807e-09	1.56677e-09
V1	0.24	1.14719e-08	6.44077e-09	7.10718e-09	2.00563e-08	1.02376e-08	3.0983e-08	4.35323e-09	1.14435e-09	4.83598e-09	6.56762e-09	6.66136e-09	5.74599e-10	1.84554e-09	1.73298e-09	3.66058e-09	2.6259e-09	3.86939e-09	5.70675e-10	1.25468e-09	1.54688e-09	2.5106e-09	3.09784e-09	5.93822e-10	9.59472e-10	1.26714e-09	3.45914e-10	1.25894e-09	1.71125e-09
V1	0.245	1.26357e-08	4.05904e-09	7.21206e-09	1.7339e-08	6.50407e-09	2.59222e-08	2.31954e-09	1.98749e-09	4.00811e-09	6.44119e-09	5.35825e-09	1.0567e-09	1.24611e-09	1.72118e-09	6.05286e-09	3.44025e-09	3.60743e-09	2.60403e-10	1.28867e-09	6.28983e-10	2.94012e-09	2.98262e-09	6.59861e-10	1.33939e-09	1.72986e-09	3.4678e-10	1.30931e-09	1.01334e-09
V1	0.25	5.1595e-09	2.39903e-09	3.15941e-09	9.51388e-09	3.3116e-09	1.20122e-08	1.72263e-09	6.70251e-10	1.72375e-09	3.25095e-09	2.63694e-09	2.25165e-10	5.35957e-10	4.66498e-10	1.59069e-09	1.37451e-09	1.50145e-09	2.32906e-10	6.40674e-10	5.98651e-10	9.87707e-10	1.60033e-09	2.0454e-10	2.91095e-10	5.16393e-10	4.25953e-11	5.12167e-10	5.00799e-10
